# Supplementary material for: Pushing the Pace of Tree Species Migration
Source: PLoS One. 2014 Aug 27;9(8):e105380. doi: 10.1371/journal.pone.0105380 (PMC4146538; doi:10.1371/journal.pone.0105380)
Supplement: File S2 — Spreadsheet file containing data shown in the published figures. (XLSX) [file pone.0105380.s004.xlsx]

## Sheet: Gen'l info
SUPPLEMENTARY INFORMATION
Lazarus & McGill (2014) Pushing the pace of tree species migration, PLOS ONE.
This document consists of two sheets containing the data for the figures published in the article.
Sheet 1 ('Fig data - main') provides data shown in Figs. 2 - 5.
Sheet 2 ('Fig data - SI') provides data shown in Fig. S2.
NOTES on headings & units:
Variable	Abbreviated	Units
front position	-	m
mean front migration rate	mmr	m/yr
first derivative of mmr	dmmr	m/yr/yr
standard deviation (1 sigma)	stdv	-
Hurst exponent	H	-
degrees of freedom	DOF	-
landscape disturbance	d	%
assistance ("planting")	K	%
time	t	yr

## Sheet: Fig data - main
SUPPLEMENTARY INFORMATION
Lazarus & McGill (2014) Pushing the pace of tree species migration, PLOS ONE.
FIG. 2 DATA
DOF	mmr	stdv
1	128.838	15.4351
2	94.4898	12.8185
3	82.6571	12.404
5	72.3475	14.0663
10	66.1771	12.5925
30	60.5436	13.69
100	60.4855	14.0269
FIG. 3 DATA
% disturb	mmr	stdv	mmr (H = 0)	stdv (H = 0)	mmr (H = 0.99)	stdv (H = 0.99)
0	128.838	15.4351	-	-	-	-
10	-	-	101.641	15.6912	112.48	13.7028
20	-	-	59.6702	22.7419	88.9852	18.2686
30	-	-	13.6671	28.343	77.637	21.4124
40	-	-	-29.7147	35.9958	56.2368	27.9995
50	-	-	-55.0216	36.1973	36.1076	31.6323
60	-	-	-57.8386	75.179	25.8677	38.6608
70	-	-	-72.623	313.766	1.66325	65.2212
80	-	-	-95.5651	405.458	-5.22445	126.366
90	-	-	-65.9445	263.023	-44.3118	401.758
FIG. 4 DATA
K	mmr (d = 0)	stdv	dmmr
0	128.838	15.4351	-
10	176.402	18.9406	47.5647
20	205.699	19.9662	29.2965
30	232.493	20.6218	26.7944
40	256.782	20.1826	24.2893
50	278.992	20.7034	22.2097
60	297.799	23.2616	18.8069
70	313.963	28.457	16.1643
80	328.931	37.8529	14.9673
90	342.953	40.7794	14.0226
100	355.776	48.0968	12.8232
110	369.55	57.1512	13.774
120	372.675	66.7556	3.12457
130	382.985	72.1823	10.3099
140	394.312	85.1312	11.3266
150	404.982	93.7376	10.67
160	405.709	101.729	0.72698
170	415.412	111.343	9.70316
180	422.516	119.829	7.10458
190	429.711	130.303	7.195
200	433.052	137.064	3.34045
FIG. 5 DATA
K	d = 0	d = 10	d = 20	d = 30	d = 40	d = 50	d = 60	d = 70	d = 80	d = 90
0	128.838	112.48	88.9852	77.637	56.2368	36.1076	25.8677	1.66325	-5.22445	-44.3118
20	205.699	204.107	209.563	220.052	243.475	274.426	331.216	381.819	412.896	338.168
40	256.782	270.417	283.952	307.98	343.23	365.808	412.51	433.567	400.368	263.26
60	297.799	315.515	342.113	369.262	387.969	409.372	430.822	433.103	379.866	227.54
80	328.931	353.148	378.279	398.839	424.553	441.367	456.341	453.39	356.899	195.402
100	355.776	380.661	404.352	437.156	445.358	461.444	460.968	429.851	335.525	160.63
120	372.675	407.616	428.082	448.663	464.853	469.507	450.092	410.152	330.848	157.363
140	394.312	427.393	440.704	462.959	468.378	480.941	456.695	404.857	309.542	149.059
160	405.709	441.202	457.785	480.679	487.066	473.77	453.578	403.354	292.437	126.02
180	422.516	454.907	469.005	492.769	492.76	480.075	449.099	394.621	274.006	116.127
200	433.052	463.247	481.824	488.515	490.612	478.003	451.011	371.761	276.447	115.507

## Sheet: Fig data - SI
SUPPLEMENTARY INFORMATION
Lazarus & McGill (2014) Pushing the pace of tree species migration, PLOS ONE.
FIG. S2 DATA (note that these data are mean migration front position, in units m)
t	K = 0	K = 10	K = 20	K = 30	K = 40	K = 50	K = 60	K = 70	K = 80	K = 90	K = 100	K = 110	K = 120	K = 130	K = 140	K = 150	K = 160	K = 170	K = 180	K = 190	K = 200
1	1647.44	16485.7	16483	16484.2	16491.1	16491	16490.2	16482.5	16483.6	16487.6	16488.7	16484.9	16489.8	16479.1	16485.2	16497.2	16481.7	16492.7	16487.9	16481.2	16482
2	1710	17106	17086	17073.7	17129.1	17085.2	17101.5	17076.8	17079.8	17070.2	17080	17063.6	17076.8	17082.7	17072.8	17097.2	17090	17102.2	17097	17073	17075.1
3	1764.74	17696.3	17656.8	17655.2	17681.6	17659.9	17676.6	17621.7	17642.9	17631.3	17628.3	17628.5	17655.5	17610	17615.9	17638.7	17647.3	17687.5	17643.5	17592.1	17638.5
4	1816.67	18196.3	18145.4	18164.6	18205.6	18184.3	18192.3	18139.7	18155	18137.9	18130.5	18122	18174.5	18138.4	18127.2	18121.7	18125.6	18206.1	18136.7	18095.3	18152.2
5	1863.15	18664.7	18624.2	18651	18668.2	18647.3	18695.5	18611.9	18617.8	18615.3	18592.4	18607.5	18641.5	18622.4	18592.1	18583.2	18614.7	18693.5	18611.1	18588.8	18636
6	1907.03	19111.4	19091.2	19097.1	19106.2	19102.3	19134.9	19052.4	19079.1	19085.5	19036.1	19044.3	19108.3	19064.4	19065.8	19069.6	19036.8	19145.5	19070.7	19039.1	19060.8
7	1939.98	19467.8	19427.7	19417.1	19444.1	19464.1	19485	19398.4	19404.8	19413.3	19360.7	19400.8	19449.4	19412.5	19407.3	19388.9	19397.4	19489.8	19420.9	19387.5	19435.1
8	1968.54	19746.1	19717.8	19700	19714.3	19763.5	19767.7	19699.2	19694.1	19697	19648.6	19696.4	19724.7	19691.1	19688.7	19669.2	19680.5	19793.9	19708.9	19670.4	19702.5
9	1994.4	20019.8	19993.9	19982.7	20000.8	20036.8	20041.4	19969.4	19953.6	19942.7	19930.7	19962.6	20010.3	19968.2	19950.3	19946.1	19965.7	20062	19978.3	19944	19974.4
10	2017.45	20274.2	20243.6	20247.7	20259.4	20270.3	20274.9	20218.7	20201.7	20201.3	20179.6	20197.1	20260.8	20211.7	20221.2	20184.4	20191.7	20308.8	20223.6	20185.2	20201.5
11	2040.66	20512.7	20473.3	20467.7	20488.1	20511.7	20531.4	20460.4	20427.9	20428.5	20422.4	20434.8	20507.7	20455.4	20464.2	20432.3	20412.3	20544.1	20442.5	20430.5	20447.9
12	2063.91	20729.4	20689.7	20694	20699.6	20725.7	20739.6	20689.3	20637.2	20634.4	20638.8	20643.8	20733.9	20680.6	20697.7	20652.5	20627.3	20759.8	20679.5	20656.1	20675.2
13	2085.39	20931.1	20904.6	20899.5	20907.5	20940.2	20934.3	20889.8	20850.8	20843.1	20829.9	20855.4	20944.3	20873.5	20903.4	20857.1	20845.3	20978.4	20900.5	20889.6	20888.9
14	2105.1	21131	21131.1	21105	21087.4	21129.4	21145.9	21101.8	21054.2	21032.2	21029.2	21050.2	21130.7	21077	21123.7	21066.2	21043.7	21181.6	21103.9	21093.7	21095
15	2124.43	21315	21327.2	21303.7	21266.2	21336	21352.2	21296.4	21246.7	21239.6	21222.9	21244.7	21319.3	21271	21319.7	21263.5	21235	21362.9	21300.5	21296.1	21284.1
16	2143.75	21523	21520.7	21501.9	21452.7	21540.3	21541.7	21480.6	21436.9	21425.6	21426.9	21439.4	21515.8	21472.8	21511.1	21452.1	21426.1	21557.9	21481.8	21490.6	21487.1
17	2162	21705.7	21686	21697.3	21627.1	21707.4	21735.8	21651.9	21622.8	21606.1	21617	21636	21698.2	21666.2	21705.5	21630.4	21601.9	21746	21664.1	21681.7	21657.8
18	2181.48	21899.5	21873.7	21877	21815.6	21887.9	21937.6	21841.7	21799.9	21801.3	21813.2	21829.9	21901.5	21854.3	21897.1	21824.4	21796.1	21935.5	21866.8	21874	21864
19	2201.44	22074.2	22068	22057.2	21991.4	22074.8	22112.9	22024.1	21994.4	21979.9	22009.3	22019.9	22087.7	22040.4	22089.8	21993.7	21986	22131.1	22047.4	22063.1	22041.2
20	2220.38	22248.5	22246.2	22244.2	22180.3	22257.1	22310.3	22208.7	22169.7	22148.3	22194.9	22198.4	22269.5	22216.3	22283.8	22169.9	22175.7	22325.5	22232.8	22235.1	22240.8
21	2237.12	22432.2	22442.5	22422.2	22365.8	22458.1	22495.9	22394.2	22340.7	22318.9	22381.5	22381.1	22444.4	22404.9	22458.1	22345.1	22347.2	22506.8	22420	22416.7	22436.8
22	2256.51	22618.6	22619.3	22600.7	22523.6	22641.7	22672	22570.3	22517.1	22498.5	22565.5	22564.4	22615.5	22587.4	22637.5	22508.8	22525.6	22689.2	22599.9	22597.4	22624.5
23	2274.18	22793.2	22810.4	22768.2	22710.1	22828.1	22845	22744.3	22700.4	22659.4	22732.8	22737.3	22806.4	22779.8	22808.8	22696.9	22714.6	22868.8	22777.8	22777.2	22804.6
24	2292.43	22978.3	22991	22947	22889.6	23018.6	23025.7	22926.6	22881.7	22838.2	22914.9	22927.9	22979.2	22958.7	22990.4	22891.7	22898.8	23048.3	22966.6	22969.6	22994.2
25	2310.63	23157	23178.1	23137.5	23088	23200.7	23214	23122.6	23060.1	23021.8	23098.5	23111.7	23145.8	23152.8	23166.6	23076.8	23076.8	23221.9	23160.1	23149.8	23188.5
26	2329.73	23338.3	23346.5	23311.7	23271.6	23380.9	23406.9	23292.7	23226.5	23194.3	23277.7	23290.7	23335.8	23320	23347.3	23280.2	23238.2	23401.8	23343	23353	23367.7
27	2347.28	23512.2	23529.5	23492.2	23442	23543.1	23587.2	23463.2	23405.6	23377.9	23471	23480.1	23509.6	23492.2	23540.3	23470.8	23407.3	23575.2	23523.7	23532	23563.7
28	2365.32	23701.7	23694.4	23669.6	23620.4	23713.2	23771.9	23642.3	23578.2	23572.7	23645.7	23664.8	23704.1	23679.8	23718.5	23650.4	23591.8	23767.5	23698.3	23710.4	23750.2
29	2383.27	23875.7	23870.9	23851.8	23812.9	23926.2	23942	23816.3	23755.4	23740.1	23816.9	23852.4	23887.3	23847.6	23908.2	23830.7	23762.2	23940.5	23880.5	23898.8	23940.2
30	2402.52	24045.6	24073.1	24042.9	24000.4	24101	24130.5	23988.9	23937.4	23922.6	23997.8	24027.6	24060.7	24035.4	24102.9	24016.3	23938.9	24119.1	24073.4	24082.8	24121.9
31	2420.57	24233.5	24255.6	24233.5	24191.7	24277.8	24325	24172.7	24109.8	24093.2	24179.8	24219.9	24259.6	24229.4	24298.7	24211.8	24122.3	24300.8	24255.5	24275.9	24302.3
32	2436.94	24427.9	24428.7	24401.1	24380.4	24450.4	24527.1	24368.1	24301.2	24289.3	24356.8	24397	24445	24418.6	24480.9	24388.1	24281.5	24485	24436.1	24459.8	24477.4
33	2454.69	24600.1	24615.2	24593.8	24560.5	24637.7	24715	24536.9	24485.7	24465.1	24545.5	24582.7	24642.4	24628.2	24671.7	24579.8	24479.5	24654.7	24627.9	24653.3	24662.9
34	2473.23	24778.8	24788.4	24779.6	24743	24821.4	24892.8	24725.4	24664.1	24656.4	24732.7	24761.7	24834	24805	24863.2	24759.8	24661.3	24842.4	24816.6	24822.5	24856.5
35	2493.99	24983.4	24990.4	24990.3	24954.2	25030.2	25088.5	24940.3	24868.3	24846.9	24943.6	24981	25048	24998	25063.4	24971	24847.5	25045.3	25005.1	25022.5	25040
36	2511.67	25173.4	25178.5	25182.3	25148.1	25229	25290.2	25146.3	25049.2	25033.4	25145.9	25164.8	25228	25191.1	25267.4	25171.7	25041.5	25244.8	25193.6	25222.2	25242.8
37	2531.38	25380.3	25375.8	25389.8	25341.7	25421.5	25501.5	25339	25245.4	25228.4	25343.4	25341.7	25413.1	25371.9	25475.8	25372.2	25235.3	25444.2	25382.3	25419.3	25435.1
38	2550.4	25572.4	25573.3	25571.1	25541.7	25604.1	25696.5	25540.5	25454	25417.8	25553	25531.8	25615.8	25578.8	25661.5	25557.1	25430.8	25620.1	25575.6	25602.8	25630.7
39	2568.39	25764.9	25782.6	25767.3	25727.5	25817.4	25896.5	25735.1	25652.6	25621	25758.9	25720.8	25823.8	25778.4	25845	25743.8	25622.8	25808.5	25772.9	25796.7	25833.1
40	2586.92	25972.3	25982.7	25967.6	25923.2	26007.5	26101.6	25924.9	25849.5	25830	25949.3	25902.4	26027.5	25978.1	26034.3	25935	25820.2	26026.2	25964.9	25976.8	26028
41	2605.86	26180.4	26180.9	26146.4	26122.9	26203	26301.2	26124.5	26042.4	26021.4	26156.1	26092.9	26234.5	26187.6	26225.4	26122.7	26018.4	26220	26179.7	26176.1	26257
42	2626.54	26368.4	26370.2	26350.2	26316.6	26387.8	26502.9	26316.1	26238.4	26226.2	26338.8	26287.2	26411.7	26375.5	26429.6	26318.7	26214.5	26412.9	26361	26366.8	26465.3
43	2646.64	26578.1	26587.1	26549.8	26529.8	26587.8	26710.1	26534.7	26450.4	26425.7	26546.1	26481.6	26627	26579.4	26633.7	26506.8	26420.5	26636.1	26560.6	26573.6	26664.5
44	2664.24	26800.1	26789.4	26764.2	26716.9	26781.3	26911.9	26733.3	26654.1	26644.2	26760.3	26698.4	26844.8	26760.7	26839	26714.5	26619.3	26846.7	26769.1	26779.3	26871.9
45	2684	26991.2	26999.5	26956.7	26911.9	26976.5	27094.1	26921.1	26852	26833.1	26954.7	26892.8	27050.7	26951	27020	26898.6	26803.6	27051.5	26969.5	26981.6	27063.8
46	2703.71	27198.7	27196.5	27155.2	27133.8	27184.9	27306.9	27126.8	27066.3	27032.1	27165.7	27098.6	27271	27151.4	27211.9	27103.7	27013.9	27245.5	27174.4	27172.1	27272.4
47	2723.59	27408.9	27403.6	27381.8	27344.1	27392.8	27514	27326.8	27286.6	27219.1	27380.3	27306.5	27472.6	27352	27429.3	27308.2	27208.4	27427.9	27378.2	27371.6	27487.8
48	2742.05	27598.7	27610.6	27570.9	27546.6	27586.7	27720.9	27526.1	27483.1	27404.3	27575.1	27495.5	27680	27547.4	27626.3	27496.3	27427	27630.1	27588.1	27557.5	27677.9
49	2763.2	27804.2	27804	27766.8	27741.5	27778	27932.2	27726.8	27690.5	27628.4	27768.6	27691	27890	27755.5	27814.9	27693.1	27619.7	27838.6	27797.1	27757.2	27881.5
50	2783.69	28023.5	28011.5	27988.3	27938.8	27994.9	28144.3	27924.1	27911.5	27827.2	27968	27900	28099.8	27945.2	28016.5	27896.9	27839.8	28043.9	28003.1	27973.1	28081
51	2803.83	28232.4	28204.5	28202.8	28148.1	28201.8	28359.6	28124.9	28127.8	28043.9	28162.7	28116.3	28313.5	28162.1	28210.5	28098	28061	28257.9	28189.4	28189.3	28299
52	2826.56	28436.1	28413.1	28424.7	28356.4	28406.8	28568.2	28335.1	28350	28257.9	28370.9	28315.9	28543.2	28362.3	28411.9	28297.9	28283.4	28469.2	28397.3	28424.1	28513.7
53	2848.86	28624.6	28627.1	28623	28560.4	28600.7	28780.4	28537.1	28564	28466.7	28562.7	28525.9	28766	28571.4	28621.1	28480.4	28476.8	28676.8	28611.6	28615.3	28714.2
54	2869.76	28832.8	28826	28845.8	28758.2	28811.8	28982.9	28747	28765.1	28678.9	28775	28759.9	28992.3	28780.4	28831	28698.8	28686.1	28882.2	28830.7	28824.9	28929.9
55	2890.4	29035.8	29048.5	29037.5	28962.7	29025.2	29191.5	28971.3	28971.6	28883.6	28997.8	28982.8	29202.3	28993.7	29036.8	28901	28900.6	29091.3	29040.4	29020.6	29122.2
56	2912.56	29258	29263.4	29255	29194.4	29232.4	29397.6	29190.9	29188.6	29089	29201.7	29191.3	29430.7	29204.4	29239.8	29091.4	29123.3	29308.3	29256.2	29239.4	29348
57	2934.69	29479.6	29488.1	29456.7	29399.5	29450.7	29605	29399.7	29416	29308.2	29416.6	29403.3	29645.4	29408.7	29457.2	29300.5	29348.8	29522	29462.9	29470.3	29554.5
58	2956.19	29675	29682.1	29667.9	29615.5	29672.3	29802	29595.5	29617.6	29517.5	29609.9	29619.6	29873.5	29617	29666.8	29501.6	29579.7	29720.9	29655.7	29654.3	29758.2
59	2978.15	29880.5	29898.3	29892.2	29834.9	29899.1	30038.4	29804.6	29839.6	29705.7	29814.7	29817.9	30103.3	29821.5	29905.4	29704.8	29805.1	29921.6	29862.5	29870.7	29981.7
60	2998.74	30102.9	30108.1	30098.3	30034.7	30115	30242	30022.2	30064	29919.6	30024.6	30041.4	30324.6	30034.1	30112.2	29918.1	30031.9	30139.4	30080.1	30078.2	30205.1
61	3020.81	30322.7	30324	30306.9	30250.9	30316.4	30430.9	30228.4	30272.1	30131.4	30235	30269.1	30546.1	30238.4	30319.7	30121	30259.4	30349.5	30293.7	30291.3	30413.9
62	3042.17	30519.5	30531.9	30524.9	30456	30514.5	30636.7	30452.3	30490.8	30351.7	30421.9	30479.4	30765.4	30441.8	30527.2	30319.3	30475.8	30562.3	30507	30506.8	30630.2
63	3064.43	30719.6	30739.6	30741.9	30680.6	30725.4	30841.9	30668	30696.1	30563.4	30635.1	30685.6	30976.6	30646.3	30747.7	30528.3	30712.7	30783.5	30726.9	30708.1	30841.1
64	3087.42	30941.7	30942.1	30986.8	30913.1	30967.9	31051.7	30888.8	30925.9	30793.3	30849.9	30901.8	31204.1	30874.5	30971.5	30732.2	30918.8	30999.5	30948.3	30917.8	31066.7
65	3110.62	31155.4	31151.6	31194	31124.7	31191.4	31271.3	31092.1	31160.3	31009.6	31062.7	31127.7	31446.2	31089	31175.1	30950.9	31153	31226.1	31161.7	31149.4	31281
66	3131.56	31368.4	31363.9	31393	31327.2	31390.9	31468.9	31302.6	31375.4	31227.7	31287.4	31332.5	31670.7	31313.2	31390.4	31165	31364.7	31444.9	31378.7	31350	31487.5
67	3152.88	31589.2	31594.4	31624.9	31545.9	31613.9	31679.7	31520.9	31594.9	31436.8	31506.5	31545.9	31908.1	31531.7	31607.2	31391.6	31590.6	31655.4	31609.3	31562.5	31715
68	3173.29	31803	31810.2	31845	31742.9	31843.9	31895.2	31746.4	31820.6	31657.7	31729.9	31764.2	32130.4	31763.4	31837.9	31609.4	31806.4	31871.6	31829.9	31773.4	31931.3
69	3196.54	32014.5	32015.4	32040.1	31973.1	32070.2	32109.6	31963.5	32044.4	31865.2	31941	31951.1	32348.4	31983.4	32065	31838.7	32022.4	32085.8	32030.1	31999.2	32151.7
70	3217.9	32235.5	32224.2	32273.8	32198.8	32294.7	32315.7	32184.4	32258	32083.7	32164.1	32179.5	32562.7	32213.8	32293.6	32035.2	32231.9	32322.5	32257.8	32240.7	32366.6
71	3237.94	32458.2	32418.4	32482.5	32413.1	32494.7	32527.5	32395.1	32462	32286.4	32368.3	32385.7	32779.8	32430	32508.5	32249.6	32461.2	32531.1	32460	32440.9	32568.6
72	3258.32	32677.7	32647.4	32716.9	32620.9	32701	32731.4	32617	32661.6	32505	32561.1	32601.7	32994.3	32640.1	32717.7	32466.7	32699.1	32757.3	32673.6	32651.3	32764.8
73	3279.87	32894.3	32858.5	32907	32823.2	32907.9	32947.9	32826	32857.5	32705.1	32769.4	32803.6	33214.6	32862.3	32925.9	32666	32909.1	32976.3	32882.2	32860.5	32976.8
74	3301.97	33090.7	33064.5	33116.5	33068.7	33130.7	33169.9	33057.4	33077.3	32915.4	32989.1	33010.6	33431.6	33094.3	33136.4	32874.8	33133.4	33204.7	33110.6	33068.8	33201.4
75	3324.55	33295.4	33290.9	33350.1	33297.3	33355	33375.7	33274.3	33288.3	33129.2	33210.9	33229.5	33649.8	33322.2	33347.9	33101.3	33373.1	33436.1	33311	33286.4	33406.2
76	3344.44	33488.8	33494.3	33546.6	33513.4	33556.8	33573	33492.1	33482.2	33336.1	33427.3	33440.4	33862.2	33533.6	33551.2	33318.4	33596.2	33671.8	33503.5	33492.5	33617.6
77	3364.09	33696.6	33690.8	33762.6	33719.5	33767.1	33767.5	33694.1	33694.2	33540.1	33622.2	33644.6	34057.6	33753.4	33757.6	33520.5	33809.3	33895.3	33702.2	33690.5	33818.5
78	3385.84	33897.4	33909.3	33968.5	33934.4	34004.7	33981	33898.4	33910.6	33736.3	33847.7	33873.3	34271.5	33985.5	33963.4	33735.7	34031.5	34110.1	33904.7	33893.4	34021
79	3406.22	34109.9	34115.2	34164.1	34139.1	34221.5	34204.6	34114.4	34130.2	33956.8	34039.2	34071	34478.5	34202.4	34175.5	33943.1	34245.3	34320.9	34108.1	34102.4	34230.5
80	3427.63	34315.7	34338	34386	34357.5	34435.7	34426.5	34323.9	34338.5	34176.8	34251	34269.9	34702.4	34421.6	34384.2	34152.4	34476.7	34551.2	34328	34326.3	34454
81	3449.37	34532.4	34540.9	34598.2	34580.6	34665	34638.9	34554.1	34570.6	34373.1	34442.8	34459.8	34916.9	34632.8	34580.1	34352.3	34704.4	34761.1	34550.5	34536.9	34649.5
82	3471.95	34750.3	34744	34820.3	34792.4	34863.4	34859.8	34766.2	34807.4	34606.8	34679	34648.1	35128	34846.7	34788.7	34563.2	34924.1	34985.8	34786.1	34737	34868.7
83	3492.37	34964.4	34958.9	35040.6	34998	35077.3	35063.1	34981.8	35026.4	34820	34894	34866.5	35345	35070.3	34989.7	34777.7	35137.6	35204.2	35003.6	34954.8	35093.9
84	3512.68	35169.7	35165.4	35243.1	35216.3	35292.8	35290.6	35209.5	35227.2	35016.6	35093.9	35084.7	35563.4	35281.9	35203.9	34975.6	35357.8	35409.7	35198	35164.5	35296.1
85	3535.4	35385	35394.4	35463.1	35458.4	35493.9	35510.9	35429.5	35457.6	35251.7	35316.1	35305.6	35784.8	35515.4	35442.3	35194.1	35583.2	35637.7	35421.6	35396.6	35527.7
86	3556.57	35596.2	35615.2	35678.6	35691.8	35704	35722.4	35631	35688.2	35479.8	35530.3	35512.2	36000.9	35753.6	35660.9	35406.2	35804	35872	35640.9	35607.1	35761.7
87	3579	35798	35832.7	35887.1	35922.9	35914.5	35944.9	35866.4	35898.1	35701	35725.2	35722	36208.4	35968.7	35859.8	35614.7	36023.8	36116.8	35862.7	35814.5	35968.9
88	3599.83	36009.2	36058.3	36101.5	36138	36129.5	36158.9	36080	36098.7	35922.5	35929.3	35939.4	36403.6	36201.7	36055.9	35833.6	36248.2	36337.1	36083.7	36018	36197.7
89	3619.81	36220.6	36265.8	36304.5	36346.7	36339.2	36335.3	36293.6	36310.3	36112	36134.7	36139.6	36628	36422.9	36258.9	36016.9	36450.4	36539.8	36311.6	36227.3	36415.5
90	3640.33	36438	36463.1	36509.3	36543	36538.7	36554	36513.3	36518.3	36331.6	36358.7	36338.8	36852	36619.4	36479.1	36230.8	36632.3	36763.3	36515.1	36421.7	36627.6
91	3661.46	36664.5	36687	36730.5	36764.1	36741.1	36764.7	36736.5	36729.5	36527.8	36575.6	36552.7	37074.5	36840.5	36693.8	36454.9	36847.5	36985.7	36727.5	36617.9	36821.2
92	3680.51	36863.3	36893.9	36933.7	36973	36968.5	36970.4	36951	36949.1	36741	36780.6	36752.2	37282.7	37039.7	36895.5	36646.6	37034.4	37180.6	36918.7	36829.6	37027.8
93	3703.11	37090.7	37112.4	37148.8	37162.3	37176.7	37181.3	37157.9	37175.3	36947.2	36998.9	36957.9	37502.5	37268.1	37139.9	36864.5	37258.6	37398	37131.6	37048	37239.5
94	3720.48	37304.4	37320.4	37341	37358.5	37369.9	37393.5	37373.8	37398.8	37148.4	37196.9	37147	37707.8	37460.3	37355	37069.9	37479.5	37600.6	37342	37240.4	37456.9
95	3743.44	37519.9	37528.1	37543.5	37551.3	37581.6	37584.1	37585.5	37631.6	37352.9	37396.4	37344.6	37943.6	37659.7	37559.2	37275.5	37695.7	37824.3	37546.8	37449.6	37645.3
96	3763.54	37704.4	37726.4	37746.4	37734.5	37765	37789.7	37776.6	37833	37522.8	37583.6	37530.7	38129.4	37869.7	37759.7	37467.3	37879.6	38023.2	37760.1	37627.3	37829.3
97	3782.87	37900.8	37933.2	37955.8	37928.7	37964.2	37991.6	37959.5	38035.7	37725.7	37775.7	37700.1	38314.7	38076	37949	37663.4	38076.6	38224	37932.9	37804.5	38013.1
98	3801.69	38101.4	38151.6	38160.1	38122.8	38163.5	38189.6	38163.5	38233.2	37927.5	37999.5	37893.5	38517.6	38297.4	38160.3	37863.2	38278.1	38443.9	38129.5	38001.4	38193.2
99	3821.46	38302.6	38366.9	38354.9	38309.9	38352.4	38402.9	38395	38434.6	38140	38214	38079.2	38711.5	38505.5	38370.4	38070	38478.7	38642	38341.9	38191.5	38397.4
100	3841.09	38510.9	38555.7	38535.8	38512.1	38545.7	38603.1	38572.1	38639.3	38330.6	38431.8	38270.1	38924.9	38706.8	38583.8	38261.3	38691.4	38828.4	38539.2	38364.6	38604.1
101	3860.39	38699.2	38764.3	38746.8	38704.1	38742.9	38809.3	38757.2	38853.8	38534	38643.5	38464.8	39115.4	38894.1	38793.1	38485.5	38917.2	39011.3	38742.3	38542.8	38781.7
102	3877.84	38906.6	38962.9	38928.8	38896.3	38906.9	39000.5	38946.4	39054.6	38720.2	38817	38650.2	39299.8	39070	38975.7	38665.6	39125.8	39218.6	38929.6	38734.5	38960.8
103	3894.85	39101.6	39151.1	39115.5	39094.2	39097.5	39175.8	39131.9	39217.2	38921.6	39000.3	38833.6	39497.5	39255.4	39144.4	38852.2	39315.4	39405.8	39122.3	38908.2	39154.9
104	3914.79	39286.4	39352.8	39318.5	39281.2	39296	39367.6	39331.8	39402.2	39125.9	39179.6	39034.7	39687.4	39452.9	39331.5	39060	39521.8	39592.6	39315.4	39081	39354.4
105	3934.76	39461.6	39506.4	39506.9	39438.8	39499.7	39550.1	39514.5	39580	39304.9	39352.5	39222.6	39882	39638	39512.7	39266	39707	39757.4	39514	39263	39524
106	3953.67	39621.3	39700.8	39708.8	39612.6	39674.6	39737.6	39699.9	39760.4	39498.2	39527	39391.1	40074.3	39821.8	39698.9	39437.9	39883.5	39948.1	39693.5	39441.6	39714.6
107	3971.15	39804.9	39880.1	39889.5	39812.1	39857.4	39921.2	39864	39947	39695.4	39730.2	39565.5	40267.5	40000.4	39888.3	39616.6	40099.9	40133.7	39891.9	39632.4	39896.2
108	3989.12	39991.6	40073.7	40056	39979.9	40022.9	40086.2	40036.7	40127.6	39863.7	39912.4	39748.7	40424.8	40153.4	40032.9	39777.2	40284.9	40298.2	40038.2	39784.8	40053.9
109	4004.64	40159.5	40246.2	40217.3	40143.8	40197.1	40270.1	40206.3	40285.8	40026.2	40078.1	39901.8	40601	40312.7	40215.8	39958.4	40453.6	40461.4	40230	39956.1	40217.2
110	4022.42	40322.7	40444.6	40401.8	40302.1	40341.3	40460.7	40384.5	40446.5	40201.8	40247.5	40077.9	40752.9	40465.1	40395.3	40134.6	40609.8	40637.9	40404.8	40108.2	40388.2
111	4039.81	40491.3	40609.2	40550.2	40466.8	40522.2	40631.3	40546.2	40597.8	40375.5	40395.2	40246.9	40903.5	40637.8	40558.9	40306.5	40764.1	40816	40560	40276.4	40569.4
112	4056.55	40632	40749.3	40721.6	40620.8	40704.3	40795	40712.4	40745.8	40525.6	40567.8	40382.4	41083.8	40796.2	40705.4	40455.4	40943	40973.4	40703.9	40417.3	40728.8
113	4072.03	40785.5	40909.6	40887.2	40762.7	40848.4	40972.9	40882.8	40901.6	40672.1	40736.4	40535.9	41249.2	40964.6	40859.9	40618.6	41096.7	41146.8	40848.9	40564.6	40889.7
114	4087.87	40932.4	41050.7	41042.8	40930.7	41013.7	41128.8	41028.8	41070.8	40841.5	40907.2	40723.5	41406.4	41132.3	41005.3	40763.5	41261.9	41294.8	40987.3	40725	41036.6
115	4103.75	41071.3	41206.2	41182.2	41098.7	41173	41296.5	41199	41237.1	40999.9	41078.8	40857.9	41542.2	41288.6	41150.3	40902.9	41399.8	41436.6	41152.9	40887.1	41199.4
116	4120.48	41227.9	41364.4	41333.1	41266.5	41309.6	41453.9	41352.6	41376.4	41153.1	41228.7	40998.9	41694.6	41436.6	41289.5	41060	41560.5	41579	41297.1	41037.2	41349.6
117	4134.44	41388.2	41524.1	41454.5	41406.1	41438.3	41583.2	41499	41535.1	41307	41360.3	41136.3	41855.5	41590.6	41428.5	41207.1	41721.7	41725.3	41456.4	41182.6	41493.3
118	4149.7	41527.4	41658.7	41601.3	41515.2	41582.5	41712.3	41613.4	41680.3	41442.1	41491.1	41276.1	41990.5	41726.7	41544.7	41322.1	41865.1	41847.8	41587.5	41306.1	41642.1
119	4165.37	41677.7	41811.2	41742.9	41643.6	41738.2	41850.3	41750.9	41829	41600	41626	41433.4	42121.6	41865.7	41677.6	41447.4	42023	41996.2	41721.6	41441.7	41792.2
120	4178.72	41794.3	41974	41868.3	41772.4	41863.1	41964.2	41881.3	41988	41717.1	41756.9	41573.7	42237.2	42003.6	41811.9	41559.1	42134.1	42134.1	41848.9	41559.7	41940.9
121	4191.83	41937.1	42121.9	42012	41904.6	41984.3	42109.9	42002.7	42109.1	41847.3	41902.1	41695	42362.3	42133.2	41953.1	41701.3	42246.4	42303.9	41968.1	41690.9	42081.2
122	4203.09	42056.8	42242.3	42133.8	42030.5	42091.4	42228.2	42116.8	42232.5	41971.8	42035.4	41821.2	42487.3	42255.5	42053.1	41832.1	42385.1	42408.9	42099.3	41825.6	42194.7
123	4212.57	42196.8	42350	42270.4	42164	42210.4	42353.6	42234.5	42351.4	42108.5	42163.4	41948.5	42605.5	42384.1	42185.7	41933.1	42507.4	42531.9	42224.7	41932.2	42346.2
124	4225.23	42301.6	42472.7	42364.1	42277.6	42332.1	42467.4	42331.3	42499.2	42229.4	42299.4	42058.3	42714.3	42511.1	42297.3	42051.9	42639.2	42644.4	42350.6	42066.2	42473.3
125	4235.59	42411.9	42587.4	42478.2	42387.9	42440	42588.4	42433.1	42613.3	42311.6	42420.5	42176.8	42829.7	42644.9	42415.4	42142.9	42783.6	42765.4	42474.7	42179	42595.2
126	4249.22	42519	42700.5	42587.3	42494.7	42545.2	42698.2	42544.1	42719.1	42446.9	42541.5	42291.5	42952.7	42755.6	42549.7	42247.1	42900.8	42873	42593.7	42287.3	42698.7
127	4262.72	42636.8	42812.5	42699	42630.7	42655.5	42815	42650.4	42842.9	42561.3	42661	42408.2	43075.8	42867.3	42676.7	42339.8	43027.3	42994	42710.7	42406.7	42804.8
128	4273.69	42757.9	42927.8	42810.3	42753.6	42766.4	42913.8	42762.1	42970.2	42687.2	42763.5	42504.5	43202	43010.7	42796	42451.2	43128.1	43102.3	42838.3	42517.4	42900.7
129	4283.47	42861.1	43038.3	42904.2	42867.8	42869.8	43014.7	42862.8	43070.9	42800.7	42872.9	42595.8	43309.5	43117.7	42905.5	42557.3	43225.5	43196.7	42924.6	42627.3	43014.2
130	4292.23	42957	43123.4	42995.7	42958.8	42971.6	43108	42942.7	43152.7	42901.4	42977.3	42694.7	43425.6	43206.1	43019.3	42652.7	43337	43304.2	43028.1	42748.4	43116.3
131	4301.64	43045.2	43228	43094.7	43049.9	43062.7	43187.7	43018.2	43264.3	43007	43074.4	42793.2	43546.1	43309.4	43119.8	42726.4	43441.6	43402.1	43110	42843.2	43207.6
132	4312.31	43138.6	43341.5	43186.5	43142.6	43177.8	43289.2	43107.7	43354.5	43119.8	43186.2	42866.3	43649.5	43402.6	43234.5	42818.9	43570.3	43506.3	43245	42945.3	43311.6
133	4319.18	43225.4	43415.9	43257.9	43234.8	43291.6	43372.9	43177.1	43444.5	43213.1	43295	42932.9	43722.9	43506.8	43316.6	42884	43654	43612.5	43336.8	43046.1	43377.7
134	4328.33	43316	43518.6	43336.3	43335	43383.9	43439.1	43259.3	43527.3	43316.5	43362.7	43023.5	43800.3	43577.9	43414.2	42965	43753.7	43696.7	43429.1	43132.8	43438.7
135	4336.89	43409.3	43607	43430.3	43422.5	43468.4	43516.1	43359.4	43599.5	43413.5	43465.2	43085.7	43920	43674.2	43509.6	43046.5	43880.7	43788.2	43504.5	43194.6	43516.5
136	4345.17	43496.8	43707.1	43533.5	43490.9	43563.5	43591.4	43451.2	43677.8	43485.2	43575.5	43165.9	44015.9	43787.6	43612.3	43137.2	43968.6	43866.3	43607.2	43275.6	43612.2
137	4353	43587.2	43792.1	43612.7	43587	43649.3	43655.6	43509	43767.5	43562	43670.5	43239.7	44089.5	43870.6	43707	43208.8	44068.1	43948.6	43700.1	43365.1	43690.5
138	4360.66	43649	43863	43696.2	43668.9	43736.6	43729.8	43591.8	43841.4	43659.1	43738.1	43294.7	44175.6	43939.1	43788.9	43276.8	44139	44024.1	43771.9	43431.9	43766.3
139	4368.23	43724.3	43964.3	43763.7	43757.8	43822.4	43787.3	43668.1	43920.9	43726.2	43811.4	43362.7	44255.6	44002.3	43888.3	43377.1	44214.7	44103	43842.3	43507.9	43843.1
140	4376.17	43800	44044.8	43844.1	43844.7	43922.3	43844.4	43730.2	44008.7	43802.1	43880.5	43432.9	44321.8	44067	43965.9	43457	44277.1	44183.3	43922.3	43583.1	43906.6
141	4384.79	43857.1	44116.2	43921	43913.2	44006.7	43909.3	43799.4	44104.9	43890.5	43944.9	43519.9	44389.6	44147.5	44040.5	43519.4	44366.5	44248.1	44001.1	43670.2	43963.7
142	4391.71	43905.8	44185.3	43997.5	43989.6	44073.6	43988.7	43872.5	44198.2	43966.6	44022	43628.4	44474	44234.5	44116.6	43584.4	44436.5	44315.5	44076.4	43727.1	44030.5
143	4397.73	43977.7	44243.6	44035.6	44065.2	44169.8	44066.9	43940.3	44271.9	44054.6	44075.7	43701.1	44559.7	44308.7	44183.8	43683.3	44508.6	44368.6	44166.4	43815.9	44070
144	4404.47	44032.8	44319.7	44109.5	44117.9	44256.9	44148	44003.8	44338.3	44144.1	44140.5	43773.3	44636.5	44359.9	44235.5	43770.2	44579.3	44422.6	44241.8	43898.5	44152
145	4410.8	44111.6	44415.1	44176.2	44193.8	44337	44213.7	44073.4	44412.9	44228.5	44217.2	43831.8	44707	44439.7	44318.1	43869.9	44629.9	44483.4	44313	43971.2	44222.9
146	4418.76	44186.9	44503.1	44252.3	44263.8	44417.4	44274.1	44154.8	44475.6	44307.6	44288.9	43907.5	44768.7	44539.1	44410.4	43942	44689.8	44563.4	44369.1	44047.6	44294.7
147	4427.79	44252.1	44574.4	44329.4	44319.1	44467.6	44346.5	44236.6	44552	44394	44374.7	43991	44836.3	44616.5	44494.1	44007.2	44757.2	44613.9	44442.1	44109.2	44360.1
148	4433.86	44329.7	44637.1	44389	44407.7	44544.4	44431.6	44299.6	44627	44466.4	44455.1	44061.1	44912.2	44698	44574	44074.9	44822.8	44679.4	44517.4	44170.2	44427.5
149	4441.89	44406.5	44719.3	44448.4	44488	44613	44505.1	44369	44693.3	44526.6	44510.2	44133.8	44985.3	44782.9	44641	44153.1	44880.7	44749.9	44578	44247.1	44507.3
150	4448.64	44474.6	44792	44513.7	44543.6	44671.9	44561.3	44435.6	44757.7	44581.7	44549.2	44193.2	45052.7	44846	44724.4	44226.5	44947.6	44809.6	44643.4	44340	44564.7
151	4455.71	44535.8	44869.6	44576.6	44600.9	44747.9	44612.2	44508.2	44807.6	44636.6	44600.2	44248	45126.9	44938.6	44804.4	44284.5	45022.6	44883	44724.7	44413.8	44642.6
152	4463.74	44592	44936.5	44649.7	44666.3	44794.5	44675.4	44567.2	44858.7	44701.2	44645	44297.6	45186.7	44995.8	44868.6	44350.4	45090.1	44921.2	44780.1	44461	44692
153	4469.13	44647.7	45003.3	44725.8	44707.6	44843.5	44731.7	44620	44909.7	44778.9	44705	44356.3	45226.7	45056.3	44950	44409.4	45153.4	44974.1	44847.4	44543.5	44738.6
154	4476.98	44725.7	45081.5	44777.6	44774.1	44906.4	44759.5	44699.7	44966.9	44834.1	44760.9	44435.9	45283.5	45144.7	45019.8	44495.9	45239.1	45030.6	44897.6	44615.1	44819.9
155	4483.6	44779.5	45141.7	44850.3	44820.5	44980.1	44798.7	44772.2	45032.3	44906.3	44813.5	44508.3	45366.5	45213.5	45086.4	44551.5	45301.2	45094.2	44957.8	44677.1	44883
156	4490.36	44842	45202	44911.2	44882.4	45015.6	44873.3	44841	45098	44985.9	44863.7	44580.2	45425.3	45284.6	45151.8	44611.1	45360.3	45138.3	45027.6	44720.8	44950
157	4496.79	44900.4	45261.3	44967.3	44944.7	45079	44918.5	44907.8	45174.8	45050.5	44925.3	44672.8	45480	45366.3	45210.7	44660.1	45425.6	45200.8	45094.3	44778.4	45005.2
158	4504.46	44973.1	45321.8	45042.2	45007.1	45106.3	44987.3	44954.9	45251.4	45125.5	44999.8	44726.4	45543.3	45454.7	45257.6	44751.4	45489.1	45252.2	45143.9	44826.7	45068.6
159	4510.58	45026.5	45363.8	45114.3	45059.8	45161.1	45053.9	45026.4	45309.2	45190.8	45071.3	44794.9	45626.7	45510.4	45326.3	44814.2	45531.4	45316.7	45218.9	44892.6	45118.9
160	4519.95	45061.4	45413	45165.9	45134.5	45238.9	45112.1	45093.8	45385.3	45244.2	45116.1	44874.7	45704.8	45595.2	45396.8	44880.1	45596	45372	45296.2	44946	45170.5
161	4527.03	45128.9	45476	45247	45188.2	45309.4	45178	45159.6	45437	45324.7	45188.8	44965.3	45768.3	45687.2	45461.2	44949.8	45658.5	45442.1	45366.4	45018.5	45237
162	4533.63	45175.4	45528.8	45316.3	45248.5	45348.8	45249.7	45232.6	45496.7	45375.9	45244.4	45064.5	45840.2	45741	45537.8	45016.9	45728.6	45502.4	45429.1	45076.8	45316
163	4542.61	45231.3	45580.3	45390.7	45309.7	45419.1	45306.6	45290.1	45567.8	45427.8	45303.3	45120.6	45906.1	45803.5	45595.1	45089.6	45803.4	45553.6	45490.2	45143.1	45393.1
164	4551.12	45280.5	45669.7	45459.9	45382.3	45467.7	45372.9	45362.7	45612.5	45502.9	45355.9	45197.4	45981.7	45877.9	45672.9	45156	45863.5	45627.8	45581	45224.4	45455.6
165	4557.2	45350.1	45722	45517.8	45434.4	45540.8	45444.6	45428.6	45656.1	45583.1	45414.2	45254.1	46064.4	45963.3	45719.7	45229.6	45950.4	45695.6	45655.6	45263.5	45519
166	4562.4	45398.7	45785.3	45599.8	45479.3	45607.6	45506.1	45487.2	45715.6	45640.7	45487.9	45314.1	46127.4	46044.4	45789.3	45281.9	46026.1	45759.3	45704.2	45306.3	45599.6
167	4570.6	45454	45854.2	45667.9	45548.8	45653.5	45573.9	45570	45772.8	45694.5	45555.4	45377.3	46198.9	46113.1	45861.6	45339.8	46088	45819.9	45771.9	45364.9	45676.1
168	4578.99	45505.2	45936.4	45732.2	45606.7	45731.9	45622.3	45647.8	45857.9	45753.9	45630.6	45456	46266	46181.1	45923.7	45431.5	46157.5	45910.8	45847.7	45433.9	45756.4
169	4587.22	45581.5	46000.8	45818.3	45661.8	45806.1	45685.1	45737.5	45938.7	45819.9	45690.7	45524	46327.2	46264.1	45991.4	45504.5	46235.9	45985.5	45924.4	45515.2	45826.9
170	4593.37	45640.2	46073.7	45874.9	45733.8	45869	45753.3	45819.4	45993.8	45875.1	45770	45593.5	46403	46325.6	46059.4	45587.3	46287.2	46060.3	46013.7	45579.4	45915.6
171	4601.33	45693.3	46128.1	45935.2	45797.9	45928.8	45818.8	45881.2	46062.6	45942.6	45838.3	45656.1	46463.6	46394.6	46155.3	45660.6	46350.4	46128.4	46087.8	45675.8	45993.9
172	4607.05	45745.8	46193.7	46021.4	45856.6	46014.9	45890.9	45942.4	46133.8	46000.4	45917.7	45725.6	46531	46449.1	46233.9	45722.3	46425.5	46183.5	46169.1	45759.6	46086.9
173	4613.55	45800.7	46255.7	46071.9	45930.1	46095.4	45969.5	46014	46203.3	46082.9	46010.3	45796.5	46602.4	46517.3	46327.8	45787.5	46522.8	46259.3	46247.9	45819.3	46180.6
174	4621.04	45881.1	46321.6	46143.3	46006.9	46167.7	46050	46077.5	46261	46153.7	46089.9	45840.1	46691.3	46586.9	46399.4	45854.8	46577.2	46311	46322.6	45894.4	46265.5
175	4628.6	45979.3	46398.7	46218.9	46093.4	46253	46142.1	46151.1	46325.7	46220.1	46166.8	45899.1	46756.6	46670.6	46487.6	45941.4	46668.9	46394.5	46391.1	45984.9	46344.5
176	4636.98	46067.8	46484.9	46296	46151.3	46334.2	46203.3	46233.6	46389.3	46290.6	46243.3	45992.1	46821.5	46747.7	46550.1	46011.1	46752.1	46467.7	46468.4	46053.6	46421.8
177	4645.33	46149.3	46564.8	46377.6	46233.7	46396	46279.9	46316.8	46457.4	46377.6	46329.4	46058	46897	46817.3	46619.8	46096.5	46826.6	46568.4	46527.7	46107.7	46508
178	4652.12	46230.1	46622.4	46457	46294.6	46480.1	46343.5	46402	46533.6	46448	46423.6	46130.6	46961.6	46888	46687.4	46183.6	46907.4	46655.1	46600.3	46191.4	46590
179	4659.17	46315.5	46698.8	46542.1	46374.4	46546.2	46417.3	46496.7	46623.4	46541.8	46510.3	46227.1	47048.7	46943.2	46745.5	46266.2	46980.7	46743.9	46694.8	46274.1	46668.4
180	4664.37	46393.1	46758.5	46621.2	46456.1	46615.1	46504.7	46576.5	46704.8	46624.9	46589.4	46293	47141.2	47020.1	46834.4	46339.7	47057.6	46802.5	46759.1	46341.5	46734.7
181	4672.35	46474.5	46852.2	46703.1	46528.1	46712.6	46600.3	46657.7	46797	46707.9	46672.6	46363.3	47207.7	47116.7	46898	46416.6	47148.7	46892.1	46849.4	46420.7	46818.3
182	4680.66	46557.4	46949.5	46780.5	46589.2	46800.7	46700.9	46733.7	46876.7	46792.1	46766.4	46447.7	47282.4	47205.4	46974.6	46489.3	47226.5	46972.6	46910.5	46508.6	46896.5
183	4688.93	46635.6	47035.1	46865.1	46664.2	46876.3	46784	46814.8	46977.2	46875.4	46839.3	46524.4	47376.7	47282.7	47068.3	46568.4	47304.4	47053.5	46984.4	46598.9	46998.3
184	4698.42	46720	47131.8	46956.2	46753.5	46943.1	46873.5	46894.7	47056.7	46957.6	46929.9	46615.4	47468.3	47365	47162.7	46642.1	47385.4	47151	47065.3	46684.3	47071.9
185	4706.87	46806.9	47245.6	47041.4	46833	47026.8	46970.6	46992.8	47139.2	47060.2	47023.2	46695.8	47557.2	47453	47251.7	46723.3	47466.7	47247.4	47141.5	46762	47144.2
186	4715.19	46903.7	47337	47124.7	46917.5	47100.9	47029.3	47094.4	47215.5	47148	47097.6	46783.5	47643.4	47530.4	47320.8	46819.4	47570.5	47326.5	47223	46853.7	47223
187	4723.71	46985.4	47422.9	47224.1	47014.5	47193.4	47130.9	47197.8	47307.6	47245.1	47180.5	46878.5	47722.2	47608.6	47411.7	46896.5	47664.5	47424.1	47306.9	46964	47294.5
188	4732.77	47052.8	47526.3	47305.3	47110	47278.3	47225.4	47286.7	47390.3	47341.5	47276.8	46960.5	47818	47704.6	47497.8	47013.7	47758.2	47488.5	47398.7	47040.2	47375.6
189	4741.53	47140.6	47623.6	47392.8	47212.5	47366.7	47323.8	47388.3	47485.4	47440.3	47360	47054.9	47906.4	47798.7	47600.3	47096.7	47841.2	47586.9	47480.1	47131.9	47470.3
190	4750.25	47209.3	47709.5	47482.5	47315.4	47466	47421.6	47476.4	47579.8	47535.1	47446.1	47155.7	48004.8	47877.9	47683.5	47186	47939.1	47677.6	47584.2	47207.7	47541.2
191	4759.77	47294	47786.1	47557.7	47405.7	47571.8	47505	47562.8	47681.1	47645.5	47538.3	47248.5	48124.9	47991	47784.4	47259.5	48027.2	47782.4	47669	47310.1	47631.9
192	4769.13	47388.6	47901.3	47658.8	47489.7	47651.9	47583.9	47663.5	47783.7	47733.3	47637.1	47353.4	48216.9	48087.2	47875.9	47358.3	48123.9	47880.8	47758.7	47381.5	47725.1
193	4777.3	47465.5	48007.6	47761.2	47588.4	47754.1	47697.4	47761.4	47885.9	47823.1	47727.7	47436.2	48320.2	48193.2	47976.2	47446.6	48228.1	47953.9	47859.6	47489.3	47819.9
194	4788.6	47553.7	48094.6	47851.5	47685.9	47862.4	47783.1	47870.5	47970.9	47905.8	47806.7	47532.7	48433	48300.4	48081.1	47533.5	48323.5	48055.2	47962.8	47590.1	47911.9
195	4800.77	47655.7	48197	47941.9	47772.2	47953.3	47877.1	47952.8	48053.6	48007.8	47888.2	47631.1	48542.9	48390.6	48179.5	47624.3	48423.9	48152.9	48075.8	47677.2	48016.3
196	4812.05	47747.9	48306.9	48040.2	47870.5	48051.9	47982.9	48041.6	48164.3	48110.5	47996.5	47724	48632	48490.4	48285.1	47731.6	48510.9	48279.5	48176.1	47769.1	48108.5
197	4821.48	47833.9	48420.9	48109.5	47969.9	48168.7	48094.7	48138.9	48262.1	48237.7	48100.1	47794.8	48725.6	48608.5	48370.1	47832.7	48632.9	48363.2	48265.5	47864.8	48220.8
198	4830.11	47917.9	48546	48203.5	48089	48273.3	48184.4	48256.1	48355.8	48345.5	48199.1	47881.1	48820.3	48694.5	48479.2	47945.7	48747.5	48474	48350.3	47957.5	48334.3
199	4840.92	48022.2	48661.4	48295.9	48192.3	48358	48281	48365.5	48459.5	48453.3	48292.2	47980.5	48911.7	48804.8	48585.3	48045	48865.9	48594.7	48455.8	48054.3	48445.9
200	4851.39	48175.3	48837.2	48467	48437.2	48640.6	48567.3	48694	48834.6	48854.4	48706.8	48450.2	49392.3	49322.5	49117.3	48629.7	49466.5	49232.3	49128.3	48764.1	49160.3
201	4863.91	48308.1	49020.3	48674.1	48646	48900.1	48855.4	49026.2	49216.8	49225	49135.6	48893.3	49862.9	49831.3	49651.7	49203.6	50039.1	49855	49810.2	49454.8	49879.4
202	4875.12	48447	49196.5	48868.2	48852.9	49148	49151.3	49340.1	49575.8	49601.6	49553.3	49321.5	50310.9	50321.5	50162.6	49763.4	50614	50469.1	50434.9	50114.2	50558.7
203	4884.9	48583.4	49356.8	49048.9	49070.2	49412.6	49448.8	49653.7	49928.7	49984	49979.1	49758.7	50775	50809.5	50693.9	50331	51197.5	51075	51073.8	50793.2	51241.6
204	4896.39	48722.9	49536	49243	49288.8	49674.5	49721.1	49959.8	50275	50335.3	50360.8	50205.8	51213.5	51293.2	51221.5	50876.3	51762.9	51682.5	51690.6	51453.3	51912.5
205	4909.02	48863.7	49701.1	49438.1	49527.2	49928.6	50011.7	50284.7	50611.4	50713.8	50769.7	50639.9	51660.5	51760.1	51725.9	51409.8	52310.5	52248.1	52315.4	52096.7	52555.8
206	4921.11	49016.8	49861.5	49644.5	49735.2	50155.8	50282.6	50588.1	50930.8	51074.8	51137.6	51067.5	52083.2	52202.9	52212.7	51921.3	52841.5	52799.7	52882.4	52690.7	53184.4
207	4931.3	49136.9	50024.8	49844.2	49958.4	50408.4	50570.9	50897.1	51254.1	51426.4	51531.8	51473.8	52541.8	52663.6	52711.8	52422.8	53395.8	53374.7	53472.7	53305.3	53808.9
208	4941.71	49266.8	50191.4	50044.2	50178.3	50651.8	50857.4	51198.5	51597.8	51790.8	51925.3	51891.3	52974.2	53145.1	53200.5	52932.4	53927.7	53942.6	54042.5	53917.5	54437.7
209	4954.02	49408.5	50386.4	50248.2	50398.5	50916	51153	51513.9	51941.1	52152	52312.7	52291.8	53419.1	53582.8	53687.8	53435.9	54458.9	54496.3	54609.5	54526.7	55048.3
210	4965.36	49554.3	50543.2	50458.1	50630.7	51172.1	51422.4	51828.6	52270.8	52523	52702.9	52727.7	53842.3	54029.7	54172.9	53953.4	54978.3	55035.4	55175.7	55117.8	55665.3
211	4977.21	49708.3	50726	50669.6	50868.1	51431	51707.3	52160.3	52619.5	52881.7	53076.4	53152.5	54257	54491.1	54636.2	54459	55491.4	55575.7	55738.3	55699.3	56275.4
212	4988.1	49850.1	50917.4	50881.1	51093.7	51691.2	52000.1	52484	52953.6	53248.1	53468.3	53574.4	54689.8	54955.1	55136.9	54954.6	56006	56125.1	56292.3	56284.4	56873.3
213	5000.7	49987.8	51088.7	51074.4	51329.8	51945.5	52300.5	52811.5	53306	53599.3	53854.5	53995.1	55115	55422.4	55618.6	55441.1	56515.4	56658.3	56857.9	56864.4	57460.8
214	5012.87	50116.6	51266.9	51279.9	51547.9	52194.6	52588.2	53133.2	53656.7	53956.6	54236.7	54395.9	55542.5	55857.9	56080.2	55932	57032.8	57178.1	57431.7	57454.4	58058.2
215	5025.07	50282.3	51444.3	51468.9	51776.3	52455.4	52871.4	53448.8	53987.2	54309.3	54621.8	54812.6	55972.4	56320.6	56552.5	56409.1	57558.6	57708.1	57982.3	58027.8	58650.3
216	5038.2	50445.6	51620.6	51663.2	52014.1	52729.2	53156	53768.1	54322.9	54681.8	55017.5	55209.4	56408.5	56761.2	56996.8	56906.4	58083.5	58265.6	58546.8	58603.6	59246.4
217	5051.54	50593.4	51792	51865.2	52258.8	52989.7	53435.2	54088.6	54671.2	55041.3	55411	55621.4	56836.4	57216	57466	57412.3	58599.8	58789.2	59062.7	59170.2	59827.3
218	5065.34	50739.2	51965.9	52075.3	52509.6	53272.9	53748.3	54419	55004.9	55399.1	55783.2	56027.9	57241.3	57666.7	57943.8	57882	59088.3	59305.4	59600.5	59718.8	60415.1
219	5077.92	50896.9	52167.7	52301.3	52736.9	53544.6	54021.6	54732.4	55382.1	55766.1	56170.8	56432.7	57685.4	58124.7	58404.7	58384.5	59583.3	59824.6	60134.5	60256.8	60994.2
220	5090.02	51055.4	52359.7	52509.5	52982.4	53838.4	54323.4	55035.1	55730.4	56141.6	56572.1	56859.3	58090.7	58586.9	58876.3	58872.7	60094.6	60347.3	60669.4	60821.5	61547.3
221	5103.4	51229.7	52547.8	52717.5	53235.4	54105.6	54634.7	55357.3	56068.4	56492.1	56958.3	57256.4	58521.4	59039.4	59338.7	59358.5	60591.5	60875	61208	61383.2	62118.7
222	5115.87	51392.5	52733.7	52918.3	53488.8	54387.1	54959.9	55676.2	56420.9	56875.8	57350.5	57683.6	58944.3	59480.2	59780.7	59829.2	61085.1	61379	61746.1	61946.2	62689.3
223	5128.95	51570.7	52918.1	53130.1	53713.2	54658	55258.7	55981	56783.1	57243.5	57730.6	58088.9	59367.7	59924.5	60255	60296.7	61583.1	61902.6	62286	62487.5	63257
224	5140.52	51733.3	53115.9	53362.6	53969	54954.3	55563.4	56312.6	57132.6	57617.7	58127.4	58493.3	59814.2	60367.6	60737.1	60784.1	62054.1	62402.7	62799.9	63027.2	63813.1
225	5153.78	51888.5	53295.5	53562.3	54219.6	55216.6	55857.1	56646.3	57489.1	57980.4	58498.3	58901.5	60226.5	60795.9	61195.2	61263.4	62535.1	62907.8	63329.8	63574.4	64352.1
226	5166.91	52050.1	53509	53785.5	54476.5	55489.5	56151	56978	57838.7	58348.6	58871.7	59296.9	60658.1	61239.1	61671	61744.8	63039.1	63419.2	63866.5	64120.8	64892.3
227	5179.29	52234.3	53709.2	54008.7	54711.2	55771.9	56461.6	57327	58205.7	58732.9	59270.7	59717.2	61075.5	61678.7	62142.2	62248.7	63529.7	63937.8	64394.2	64666.9	65452.6
228	5193.14	52397.2	53915.9	54247	54969.3	56045.2	56781.2	57671.8	58562.4	59122.5	59655.2	60144.5	61494.5	62109.2	62593.6	62738.8	64007.4	64444.6	64910.8	65214.6	66001.4
229	5206.14	52573.3	54119	54493.5	55238.9	56338.2	57104.5	57997.4	58932	59503.8	60064.3	60587.6	61936.7	62556.2	63071.5	63234.2	64513	64963.7	65436.4	65760.1	66566.3
230	5218.22	52751.5	54335.6	54739.6	55500.9	56623.1	57418.1	58333.9	59296	59863.5	60436.7	60993.2	62358.7	62987.4	63542.1	63721.5	64997.4	65451.4	65949.3	66281.1	67097.1
231	5230.23	52921.1	54533	54960.3	55752.6	56898.6	57719.8	58651.8	59656.2	60238.3	60845.2	61416.6	62802.8	63418.5	63987.6	64188.2	65478.7	65955.5	66447	66804.7	67617.5
232	5244.22	53101	54736.8	55177.5	56036.3	57190.3	58025.7	59002.1	60031.1	60617.5	61229.6	61839	63228.6	63846	64457.7	64684.3	65960	66447.8	66963.3	67327.3	68132.2
233	5257.03	53291.3	54931.9	55412.5	56308.6	57500.8	58331.2	59331.6	60396.7	60976.3	61627.9	62258.1	63647.2	64280.3	64905.4	65156.7	66428.6	66944.2	67461.8	67839.8	68676.2
234	5270.86	53483.9	55150.6	55663.1	56561.4	57804.5	58647	59669.1	60769.9	61336.1	62006.1	62672.8	64069.3	64700.8	65375.5	65642.4	66908.3	67446.6	67979	68354.1	69207.2
235	5282.51	53677.4	55369.9	55908.1	56821	58115.5	58987.4	60013.3	61138.1	61729	62401.3	63068.9	64492.4	65131.5	65824.1	66101	67402.7	67922.7	68474.8	68865.8	69720.4
236	5296.81	53869.4	55584.1	56122.9	57083.3	58404.4	59302.1	60335.3	61486.2	62108.8	62799.8	63484.6	64928.1	65579.6	66290.8	66574	67871.7	68410.3	68959.5	69370.2	70232.2
237	5312.75	54038.6	55800.4	56354.4	57374.7	58722.8	59611.7	60662.4	61844.3	62482	63195.8	63892.9	65339.3	66026.1	66750	67036.6	68334.6	68884.5	69456.6	69877.5	70747.1
238	5325.6	54232.7	56007.1	56586.3	57634.4	59004.2	59926.4	61022.7	62217.6	62856.4	63582.4	64300	65751.4	66451.3	67197.5	67510.7	68809.6	69357.1	69949.9	70371.3	71245.5
239	5338.44	54402.8	56238.8	56827.7	57907.4	59286.5	60240.3	61356.1	62588.6	63235.8	63968.3	64725.1	66182.3	66884.9	67651.1	67962.8	69271.2	69847.5	70459.2	70850.1	71759.5
240	5352.39	54582.7	56445.5	57083.5	58173.1	59587.6	60541.6	61694.3	62945.3	63623.4	64367.7	65157.1	66612	67299.6	68102.7	68437.8	69741.3	70331.1	70931.6	71337.2	72256.8
241	5367.44	54765.7	56654.5	57324.1	58456.1	59897.5	60865.6	62037.6	63308	63996.5	64778.5	65566.6	67046.9	67743	68559.2	68903.8	70188.1	70790.1	71387.5	71818.6	72757.9
242	5380.84	54953.8	56846.2	57564.8	58749.7	60179.9	61185.4	62393.5	63670.2	64383.8	65178.4	65970.4	67471.7	68175.2	68998.4	69373.5	70643.5	71254.3	71870.2	72303.8	73259.6
243	5395.34	55120.6	57024.4	57820.4	58999.2	60501	61503.1	62717.1	64049.3	64759	65579.2	66389.6	67888.6	68614.2	69438.1	69833	71100	71709.5	72344.1	72788.5	73743.2
244	5411.16	55304.2	57222	58067.9	59267	60796.3	61822.2	63074	64421.5	65121.3	65969.1	66787.8	68297.2	69033.7	69888.7	70283.6	71557.1	72176.1	72801.9	73245.7	74219.1
245	5426.87	55486.2	57424	58309.8	59517.8	61088	62165.9	63412.3	64802.9	65489.3	66352.5	67200	68705.9	69460.5	70337	70742.2	72008.5	72632	73268.1	73707.2	74678.3
246	5441.17	55668.5	57634.9	58553.9	59796.3	61379.1	62480.5	63752.8	65167.8	65890.7	66745.1	67609.9	69118.1	69852.9	70775.7	71192.4	72455.8	73086	73732	74190.9	75133.7
247	5454.87	55865.4	57865.9	58803.8	60048	61685.7	62804.7	64092.2	65521.8	66269	67133.3	68018.7	69522.9	70259.6	71205.5	71632.5	72899.4	73547.8	74194.6	74649	75611
248	5469.41	56056	58075.2	59055.7	60335.9	61970.1	63126.8	64418.4	65871.7	66634.3	67516	68420.8	69925.8	70681.9	71643.9	72069.4	73341.5	73986.4	74664.3	75127	76082.5
249	5483.94	56236.3	58301.2	59307.4	60621.1	62269.9	63457.6	64768.3	66241.7	67008.9	67915	68828.8	70331.5	71101.9	72077.5	72506.3	73764.1	74437.5	75138.5	75587.7	76528.7
250	5499.45	56415.9	58527.9	59549.9	60908	62559.7	63782.5	65100.9	66591.4	67388	68297.3	69219.9	70756.6	71498.5	72502.7	72936.2	74212.1	74872.4	75578.5	76048	76976.1
251	5513.65	56608.9	58751.7	59821.9	61186.8	62857.8	64120	65450.4	66932.6	67737.6	68678.6	69617.4	71145.3	71880.5	72918.5	73372.4	74634.5	75320.6	76038	76492.3	77424.9
252	5527.68	56793.9	58965.3	60067.7	61462.4	63167.7	64439.9	65770.4	67269	68114.6	69070	70011.9	71531.1	72294.6	73329.9	73800	75069.5	75763	76488.5	76940.1	77877.5
253	5541.77	56974.3	59187.5	60320.5	61730.3	63473.3	64780.6	66115.5	67595.7	68476.6	69441	70404.8	71930.4	72697.5	73753.1	74218.9	75476.7	76193.7	76929.9	77374.3	78311.5
254	5554.67	57156.1	59384.7	60560.8	62013.4	63764.5	65122.2	66436.9	67951.8	68849.2	69815.3	70787.9	72328.9	73104.9	74156	74644.2	75895.6	76634.7	77360.1	77804.5	78736.3
255	5568.33	57344.7	59609.2	60817.2	62281.2	64069.8	65443.7	66775.5	68301	69226.8	70199.5	71173.2	72720	73505	74566.7	75067.9	76301.4	77064.6	77809.5	78248.8	79166.9
256	5583.79	57528.1	59832.4	61075.5	62562.2	64368.7	65754.7	67121.8	68638.8	69578.8	70581.5	71557.8	73103.9	73899.6	74980.6	75486.8	76712.8	77455.5	78222	78672.9	79588.7
257	5597.38	57722.9	60041.5	61329.1	62835.3	64646.7	66087.1	67453.1	68990.9	69938.7	70961.7	71947.6	73496.2	74293.7	75379.3	75897.5	77121.5	77861	78624.7	79094.1	80028.4
258	5612.55	57905.4	60264.1	61583.4	63107.5	64961	66399.8	67809.6	69322.7	70285.3	71331.6	72329.5	73894.7	74684.1	75773.3	76307	77527.2	78267.1	79044.7	79529.5	80413.6
259	5626.67	58089.8	60485	61837	63379	65251.7	66715.3	68138.2	69672.5	70670.4	71716.8	72705.4	74263	75081.4	76185.8	76721.3	77939.8	78676.2	79457.6	79927.1	80820.4
260	5641.44	58278.3	60702.4	62103.4	63667.1	65560.7	67026.9	68474.9	70036.2	71043.2	72085.5	73108.8	74632	75454.1	76568.3	77136.6	78332.8	79080	79866.8	80347.8	81217.2
261	5655.98	58463.2	60915.4	62352.2	63963.2	65863	67349.5	68809.5	70373	71399.8	72458.6	73483.6	75018.8	75852.5	76962.5	77521.6	78722.1	79482.7	80261.4	80739.6	81612.9
262	5670.54	58637.2	61128.1	62594.7	64222.2	66149.9	67642.5	69130.7	70717.1	71759.3	72837.7	73859.2	75394	76241.7	77362.1	77919.6	79095.7	79877.3	80673.6	81126.6	82012.1
263	5684.05	58815.5	61368.4	62836.9	64502	66468.1	67945.7	69465.5	71042.7	72115.7	73215.8	74226.7	75772.4	76623.7	77744.9	78316.1	79472.5	80259.1	81062.8	81528.2	82399.1
264	5699.1	59001	61595.2	63073.6	64777.8	66775	68256.6	69781.6	71387.5	72481.9	73591.4	74591	76137.3	76998.1	78115.4	78702.6	79847.4	80638.4	81441.9	81909.3	82785.3
265	5713.03	59199.3	61813.2	63320.3	65058.7	67073.7	68582.7	70107.9	71725	72845.4	73943.6	74955.6	76523.6	77351	78475	79095.6	80234.9	81021.2	81833.9	82287.2	83167.1
266	5727.47	59368.4	62032	63584.2	65322.9	67351.6	68883.6	70426.6	72063.2	73187.8	74307.3	75326.5	76878.3	77721.7	78826.9	79469.3	80604	81393.3	82213.6	82664.1	83534.5
267	5741.86	59544.1	62261.6	63848.4	65592.6	67632.2	69203.7	70764	72401.4	73524.3	74649.1	75686.1	77243.2	78090.5	79191.1	79824.3	80966.9	81772.2	82587.4	83044.5	83893.8
268	5756.98	59738.1	62492.6	64096.2	65862.7	67911.1	69519.7	71073.3	72747	73873	74985.5	76034.1	77608.4	78434.2	79552.5	80188.8	81328.7	82134.1	82930	83413.7	84253.9
269	5772.6	59929	62737.8	64344.7	66133.2	68192.1	69829.3	71395.5	73062.1	74219.8	75332.7	76402	77943.2	78787.6	79929.1	80538	81685.8	82510.4	83296.3	83770.1	84602
270	5785.14	60132.7	62953.2	64587.5	66420.7	68489	70122.6	71724.4	73386.7	74570.3	75673.9	76750.7	78304.8	79146.4	80304.8	80887.9	82043.5	82875.4	83641.9	84113.7	84951
271	5798.66	60326.1	63158.7	64827.9	66685.1	68795.7	70426.3	72019.8	73718	74904.8	76017.5	77110.5	78657.7	79507.2	80656.7	81240.1	82384.8	83226.8	83989.3	84453	85298.7
272	5812.2	60523	63394.5	65079.9	66951.1	69094.2	70730.6	72323.5	74046.3	75223.5	76357.8	77442.6	79002.3	79861.2	80990.9	81590.8	82721.5	83562.9	84329.8	84793.6	85640
273	5825.07	60735.7	63615.5	65346.3	67213.5	69366.3	71027.6	72634.9	74376.6	75552.7	76690.1	77765.1	79322.6	80197.8	81342.6	81935.6	83055.2	83923.7	84653.7	85128.4	85967.5
274	5838.07	60926.8	63853	65601.7	67485.6	69642.2	71307.3	72929.7	74687.7	75861.1	77008.3	78103.9	79661.6	80528.7	81652.6	82278.6	83386.4	84258	84986.2	85465.6	86300.1
275	5851.09	61120.4	64066	65850.2	67752.1	69913.8	71591.6	73242.1	74996.4	76184.7	77333.7	78435.6	79993.8	80861.5	81978.6	82634.2	83714	84577.1	85310.2	85781.7	86625.7
276	5865.83	61296.9	64288.4	66094.1	68017.9	70197.7	71885.8	73545.8	75300.8	76495.7	77668.8	78760.1	80326.7	81188.5	82309.8	82953.3	84023.3	84903.7	85629.3	86094.7	86944.2
277	5879.72	61480.3	64497.7	66346.2	68280.1	70469.8	72185.5	73843.3	75618.8	76809.4	77979.7	79068.8	80644.4	81534.8	82644.7	83269.7	84354.7	85224.7	85937.2	86401.8	87241.9
278	5893.23	61667.8	64706.7	66588.7	68525.8	70744.2	72470	74163.9	75941.6	77129.4	78294.4	79386.7	80962.7	81855.2	82954.8	83573.8	84670.1	85561.1	86247	86701.1	87544.1
279	5908.99	61849.7	64925.7	66832.2	68794.1	71025.3	72760.3	74459.1	76235.6	77440.3	78613.1	79701.9	81277.4	82180.3	83265.9	83888.8	84974.8	85854.5	86554.3	87001.6	87839.3
280	5923.95	62038.2	65138.2	67089.2	69053.1	71299.9	73038.7	74767.3	76518.9	77742.9	78921.3	80012.5	81579.5	82504.5	83577.6	84199.8	85281.5	86152.4	86845.3	87297.5	88124.1
281	5939.9	62235.8	65368.1	67334.3	69303.3	71582.1	73328.1	75058.3	76819.9	78035.4	79230.3	80319.8	81879.5	82800.9	83886.6	84507	85579.5	86450.6	87132.9	87579.9	88406.9
282	5954.23	62431.9	65588.1	67577.6	69546.5	71869.3	73605.9	75346.5	77115.8	78325.5	79527.3	80628.2	82189.8	83110.8	84186.7	84816	85872.8	86733.2	87418.1	87868.9	88686
283	5968.55	62617.8	65800	67806.1	69812.8	72123.4	73878.6	75630.6	77376.2	78622.6	79814.9	80942.2	82500.9	83409.6	84466.3	85110	86158.3	87025.4	87704.8	88151.4	88964.5
284	5983.67	62804.9	66032.2	68047.5	70069.6	72389.4	74151.1	75925.4	77656.5	78927.4	80107.9	81234.4	82801.7	83701.3	84763.4	85407.5	86449.9	87305.9	87982	88432.9	89236.7
285	5997.39	62994.9	66258.9	68279.2	70325.7	72647.9	74422	76230.6	77938.6	79214.8	80401.8	81529	83081.3	83985.6	85047.2	85697.8	86739	87592.8	88251.3	88700.4	89510
286	6009.82	63179.6	66482.4	68524.4	70588.3	72936	74677.2	76522.1	78225.6	79511.5	80688.9	81831.5	83353.6	84272.7	85345.7	85978.8	87014	87869.1	88516.2	88975.7	89772.6
287	6025.1	63357.4	66679.9	68743.3	70852	73206.4	74955.5	76806.1	78497.8	79806.8	80993.7	82120.4	83636.2	84551.7	85612.2	86259.7	87288.6	88130.6	88791.9	89243.6	90034.5
288	6038.94	63553.8	66897	68964.3	71122.9	73469.7	75215.4	77091.9	78769.9	80090	81272.5	82424.7	83920.2	84842.8	85878	86543.5	87551.3	88386.8	89063.1	89505	90299.4
289	6052.94	63728.3	67120.3	69188.4	71364.5	73730.3	75486.8	77356.9	79029.5	80370.9	81561.5	82714.7	84169.7	85123.8	86133.5	86813.1	87817	88641.6	89331.5	89752.5	90560.2
290	6067.22	63915.3	67320	69411.8	71621.9	73989.5	75769.3	77623	79285.7	80677.7	81840.1	83003.7	84433.2	85394.6	86405.9	87074.2	88054.8	88892.9	89577	89982.3	90796.6
291	6082.97	64107.2	67518.9	69637.2	71876.9	74243.2	76038.4	77886.9	79545	80943.8	82123.1	83277.3	84707.3	85675.7	86660.3	87328.7	88313	89153.1	89829.2	90224	91049.2
292	6096.97	64307.2	67736.6	69872.2	72111.9	74512.1	76318.9	78158.9	79809.9	81207.8	82400.2	83547.1	84980.7	85947.8	86920	87589	88556	89395.2	90064.5	90459.2	91277.6
293	6112.49	64492.3	67955	70101.4	72358.9	74777.8	76583.1	78418.4	80099.9	81460.1	82673.1	83828.3	85217	86203.2	87172.4	87842	88774.2	89636.5	90312.4	90700.3	91506.7
294	6126.51	64671.8	68157.3	70340	72611.2	75042.9	76845.2	78675.5	80358.4	81718	82925	84092.3	85458.8	86447.4	87413.5	88099.6	89018.2	89877.7	90543.8	90941.6	91727
295	6140.35	64868.5	68381.4	70573.3	72857.7	75300.5	77104.3	78942.4	80610.4	81970.3	83182.6	84357.7	85714.2	86694.3	87668.8	88353.5	89252.7	90114.4	90772.6	91158.4	91947.7
296	6153	65061.6	68587.1	70791.1	73109.6	75567.7	77377.6	79194.5	80862.7	82236.8	83433.9	84619.9	85949.9	86926	87913.7	88575.6	89491.9	90337.8	90994.1	91378.2	92171.2
297	6165.67	65233.5	68789.4	71017.9	73353.1	75833.9	77627	79446.9	81123.2	82503.2	83693.9	84874.3	86171.4	87171.6	88158.7	88802.5	89731	90565.5	91235.6	91603.9	92386.5
298	6180.99	65399.4	68988	71247.8	73589.7	76092.2	77880.7	79699.5	81363.4	82762.2	83950	85123.5	86416.2	87418.3	88382.3	89039.6	89953.4	90776.9	91457.7	91832.4	92603.6
299	6193.14	65589.9	69181.5	71481.9	73845.2	76335.4	78143.6	79943.7	81628.6	83022	84208.4	85362.9	86646.7	87672.2	88614.4	89254.8	90171.5	90998.5	91655.7	92040	92800.9
300	6209.76	65777	69387.5	71706.6	74085.3	76566.9	78391.5	80187	81881.5	83276.8	84463.2	85619	86892.3	87893.3	88854	89481	90394.9	91201.2	91863.2	92234.6	92993.5
301	6224.89	65948.3	69590.1	71923.4	74324.3	76799.3	78635.3	80422.6	82109.8	83520.4	84713.2	85848.3	87130.4	88129.8	89082.8	89701.8	90610	91396.2	92061.8	92425.9	93184.5
302	6238.79	66135.2	69801.2	72123.9	74564.4	77049.8	78878.4	80681.1	82352.9	83761.2	84958	86085.8	87356.8	88345.8	89298.6	89924.7	90821.6	91587.6	92277.9	92629	93372.6
303	6253.75	66322.7	70021.3	72345.8	74789.4	77283.9	79117.1	80914.5	82596	84001.5	85211.9	86331.6	87583.2	88571.1	89522.8	90129	91013.6	91777	92458.7	92828.9	93550.6
304	6268.53	66498.9	70221.6	72576.7	75016.1	77539	79333.8	81146.5	82829.3	84217.8	85453.8	86564	87796.5	88795.6	89745.3	90347.3	91207.4	91972.1	92657.3	93016.1	93729.9
305	6283.73	66683.6	70423	72795.5	75254.5	77748.8	79564.8	81380.1	83054	84438.6	85691.2	86794.8	88025.4	89021.3	89953.5	90546.2	91414	92159	92843.8	93205.5	93908.8
306	6296.97	66862.1	70621	73025	75475.5	77987.1	79819.4	81605.7	83297.1	84675.8	85913.5	87010.8	88248.9	89244.2	90161.3	90752.5	91605.9	92344.8	93033.1	93376.8	94079.4
307	6310.85	67045.6	70821	73245.7	75697.6	78219.9	80056.5	81850.9	83514.3	84913.9	86129	87219.3	88474.8	89447.2	90366.1	90964.4	91796.1	92542	93214.6	93553.3	94241
308	6326.22	67216.4	71023.3	73448.6	75913.2	78451.2	80295.7	82070.3	83756	85130.3	86348.5	87434	88687.3	89655.8	90564.3	91172.3	91999.4	92706	93392.6	93726.4	94395.5
309	6339.62	67394.8	71214.2	73682.1	76131.2	78673.3	80508.6	82307	83979.7	85349.7	86566.4	87645.4	88909.3	89856.5	90752.6	91376.4	92168.8	92876.1	93576.2	93880.2	94554.4
310	6354.42	67570	71417.1	73889.8	76350.9	78895.8	80739.6	82534.1	84208.3	85582	86779.8	87854.7	89109.6	90047.5	90952	91563.7	92343.9	93042.4	93743	94039	94709.9
311	6368.46	67752.1	71619	74109.5	76583	79111.3	80968.3	82768.1	84432.4	85816.8	86986	88069.9	89316.8	90228.5	91136.2	91762	92519.1	93218.7	93906.6	94198.3	94855.6
312	6380.78	67922.5	71805.3	74331.4	76809.9	79339.2	81181.3	82991.6	84659.6	86020.9	87202	88269.2	89515.5	90423	91329.9	91948.8	92700.3	93391.3	94067.9	94357.4	95004
313	6395.4	68086.6	71999.6	74524	77031.2	79551.9	81402.9	83204.8	84878.8	86231.3	87417.3	88488.6	89712.1	90613.4	91521.6	92122.7	92869.4	93559	94224.8	94511.6	95134
314	6408.1	68260.6	72181.7	74738.5	77230.7	79776.8	81620.8	83426.4	85105.9	86431.9	87639.5	88676.5	89907.6	90792.2	91698.5	92314.6	93033.2	93728.5	94359.2	94652.9	95268.6
315	6422.95	68450.9	72366.9	74939	77450.3	79995.4	81827.9	83647.4	85322.5	86628.3	87843.6	88865.9	90086.2	90957.6	91874.5	92475.1	93204	93882	94504.1	94789	95392.7
316	6435.02	68621.5	72565.2	75140.2	77665.1	80213.1	82055.7	83855.4	85534.1	86829.8	88031.9	89066.5	90279.4	91133.6	92046.9	92633.5	93363.4	94026.4	94638.7	94928.8	95528.1
317	6449.03	68794.7	72758	75356.3	77892.4	80427.9	82255.9	84079.5	85745.4	87042.1	88223.2	89257	90470.8	91315.5	92204.8	92797.8	93530.1	94162	94795.1	95065.4	95666
318	6460.79	68964.9	72952	75561	78095.7	80621.7	82468.7	84301.7	85973.1	87246.3	88424.6	89444.6	90649.1	91501.5	92360.3	92966.2	93680.2	94303.9	94933.5	95200	95788.6
319	6473.29	69135.5	73135.6	75770.8	78325.6	80841.5	82677	84511.8	86186.4	87427.6	88616.2	89629	90831.6	91674.2	92525.8	93123.5	93829.4	94443.2	95041.8	95329.7	95909.3
320	6486.94	69322.1	73323.2	75973.9	78544.6	81053	82893.4	84734.8	86394.8	87625.7	88814.9	89808.4	91006.3	91837.9	92686.9	93273.6	93965.7	94585	95162.9	95449.8	96025.2
321	6500.45	69499.9	73499.8	76183.1	78740.9	81275.3	83088.3	84938.5	86585.7	87828.9	89001.5	89989.8	91182.4	92011.1	92847.5	93415.4	94115.6	94701.7	95295.2	95575.1	96128.6
322	6513.68	69673.1	73696.9	76399.6	78944.4	81498.4	83299.1	85149.8	86784.8	88020.6	89198.1	90159.4	91342.9	92172.2	92994.1	93569.7	94258.8	94835.6	95420	95694.4	96236.9
323	6528.28	69851.2	73893.9	76593.5	79148.1	81693	83515.1	85351.2	86963.4	88210.4	89385.4	90332.8	91497.6	92332.4	93138.5	93708.7	94391.3	94957.3	95549.9	95821.1	96341.8
324	6540.06	70013.4	74084	76793.3	79343	81893.8	83707.5	85553.6	87154.4	88386	89566.6	90505	91666.9	92495.1	93303.7	93864.6	94524.4	95078.7	95666.4	95948.8	96449.2
325	6554.44	70165.7	74257.8	76986.2	79534.5	82100.1	83889.8	85757.9	87334.3	88585.3	89753.8	90663.4	91831.5	92648.9	93447	94004.2	94667.4	95204.4	95776.2	96067.1	96552.6
326	6568.98	70338.6	74437.1	77194.8	79727	82309.7	84079	85945.1	87524.8	88776.3	89943.4	90830.6	91986	92795	93596.9	94137	94801.8	95330.1	95875.7	96175.8	96645.2
327	6582.83	70493.2	74614.9	77383.7	79906.7	82514.2	84273.1	86159.6	87717.7	88970.1	90118.9	91014.8	92121.5	92937.6	93712.5	94290.6	94926.8	95446.4	95985.1	96259.6	96743.4
328	6595.17	70675.2	74788.5	77592.4	80071.5	82712.1	84443.8	86339.9	87890.7	89137.4	90283.9	91176.2	92271.2	93072.7	93831.4	94423.7	95062.3	95553.7	96078	96372.7	96838.9
329	6608.67	70855.5	74962.7	77783.3	80270.6	82909.6	84619.2	86523.3	88067.2	89317	90449	91347.8	92425.1	93197.1	93969.6	94559.9	95179.1	95670.3	96189.9	96479.8	96932.5
330	6623.68	71031.7	75157.3	77987.7	80469.5	83105.5	84806.3	86708.3	88252.8	89474.3	90621.5	91494.2	92569.9	93335.7	94091.7	94685.1	95297.4	95779.3	96297.4	96571.7	97022.5
331	6637.51	71202.3	75339.1	78167.1	80668.6	83290.9	84976.6	86883.6	88425.8	89646.3	90803.3	91649.6	92731.6	93481.6	94220.2	94809.1	95411	95876.6	96403.4	96666.2	97106.3
332	6648.74	71370.4	75529.9	78357.5	80867.5	83479.8	85140	87092.5	88605.6	89806.8	90968.7	91810.8	92880.9	93617.8	94343.6	94935.2	95521.2	95981.6	96502	96775.9	97184.1
333	6663.09	71519.2	75700.4	78548	81051.4	83659.8	85312.5	87272.8	88770.9	89972.3	91138.4	91955.9	92998.1	93749.6	94459.3	95052	95639.2	96080.7	96596.3	96849.2	97267.4
334	6675.55	71692.2	75864.4	78745	81230.1	83852.2	85503.5	87453	88931.5	90114.8	91305.7	92105.5	93135.2	93874.3	94584.5	95164.7	95737.9	96186.8	96679.1	96938.5	97347
335	6689.77	71848.2	76034.7	78946.1	81399.5	84029.5	85689.8	87625.9	89098.1	90262.2	91458.8	92257.3	93286.2	93996.7	94694.9	95283.4	95829.6	96285.3	96762.6	97030.6	97428.3
336	6704.05	72018.9	76199.8	79120.8	81593.5	84211.1	85858.8	87805.8	89276.1	90406.4	91608.2	92407.3	93405.7	94126.5	94809.4	95383.6	95930.3	96366.2	96838.8	97106.5	97495.1
337	6716.09	72180.5	76385.8	79297.2	81795.3	84396.5	86028.8	87977	89432	90573.4	91748	92552.2	93524.2	94237.3	94914.2	95489.4	96028.9	96458.9	96919.5	97190.9	97561.3
338	6729.63	72341.1	76545.3	79488.1	81976.2	84566.3	86205	88146.2	89594.9	90723	91913.6	92673.1	93655	94355.5	95044.8	95605.9	96148.6	96547.5	97007.3	97267.4	97629.5
339	6743.78	72495.6	76720.2	79645	82141.3	84741.6	86378.2	88305.6	89744.4	90863.9	92054.1	92800.5	93784.9	94480.3	95151.7	95698	96237.4	96628.8	97079.2	97334.1	97687.5
340	6756.24	72658.7	76905.4	79820.1	82305.3	84918.7	86557.9	88463.4	89898.7	91020.4	92188.7	92937.7	93913.3	94593.1	95256.3	95801.9	96326.7	96716.4	97155.5	97403.2	97751.6
341	6770.46	72830.4	77076.1	79985.6	82484.9	85106.2	86730.5	88630.9	90058	91159.1	92319	93060.5	94021.3	94694.3	95350.2	95896.1	96422.2	96802.9	97232.1	97466.8	97800.9
342	6784.72	72995	77247.2	80161.6	82671.5	85279.4	86900.4	88797.9	90225.5	91308.9	92456.5	93182.6	94133.4	94800.8	95451.9	95996	96514.3	96875.6	97292.9	97527.9	97849
343	6798.54	73150.8	77421.9	80347	82860.5	85439.2	87063.2	88938.5	90369.4	91451.3	92569.4	93302.7	94257.5	94906.8	95554.5	96090	96585.5	96949.2	97353	97591.3	97907.1
344	6812.2	73317.1	77591.9	80520.6	83027.4	85608.5	87239.3	89096.3	90520.4	91596.6	92701.7	93416.6	94368	95005	95649.9	96191.6	96662.3	97027.8	97437.9	97646.8	97978.2
345	6825.6	73485.8	77763.1	80691.8	83196.6	85783.4	87394.6	89248.9	90670.1	91733.3	92825.3	93535.5	94484.4	95106.3	95744.1	96284.9	96735.9	97091.8	97510.1	97709.1	98022.1
346	6838.9	73636.1	77919.2	80864.4	83372.4	85936.9	87555.8	89405.4	90805.4	91877.9	92946.3	93651.6	94583.2	95213.2	95825	96364.8	96810.4	97168.8	97561	97773.8	98075.3
347	6851.52	73795.5	78086.6	81036.4	83539.6	86103.7	87700.4	89541.9	90966.5	92006.5	93072.3	93755.2	94689.9	95312.3	95906.1	96445.1	96886.5	97236.9	97619.9	97838.6	98127.3
348	6866.1	73963	78264.1	81207.7	83713.6	86273.3	87868.8	89712.2	91081.3	92135.1	93203.8	93867.3	94801.3	95405.9	95987.7	96514.1	96952.6	97311.1	97679.5	97898	98173.3
349	6878.82	74122.5	78434	81383.1	83880.4	86452.9	88030.7	89867.5	91214	92253.5	93328.6	93970.5	94901	95515.4	96083.2	96588.5	97029.8	97356.9	97740.8	97950.6	98217.4
350	6893.58	74275.5	78590.3	81556.7	84046.6	86624.7	88193.5	90024.9	91348.9	92364.5	93440	94073.3	95003	95618	96162.7	96677.1	97101.2	97416.7	97783.1	97986.7	98256.9
351	6907.98	74431.3	78744.5	81732	84209.5	86792.1	88354.9	90144.2	91487.5	92492.9	93562.9	94187.6	95094.5	95716.1	96240.2	96746.1	97177	97482.5	97836.5	98045.2	98296.4
352	6921.18	74582	78904.3	81916.9	84376	86947.9	88513.4	90286.6	91627	92614.8	93674.1	94286.2	95193.4	95812.9	96318.4	96822.3	97244.4	97536.8	97886.2	98100.4	98333
353	6934.27	74744.5	79062.1	82083.8	84547.8	87100.6	88659.1	90418	91750.2	92732.9	93776.6	94389.5	95296.7	95894.4	96400.5	96902.3	97304	97584.7	97944.3	98142.8	98368.9
354	6948.44	74901.9	79234.3	82251.6	84689.8	87260.6	88814.3	90552.4	91875.3	92847.1	93874.9	94486.5	95379.2	95977.5	96481.5	96969.6	97363.5	97647.8	97994.4	98185.6	98420.6
355	6962.07	75065.3	79378.7	82419.6	84852.7	87410.6	88952.5	90683	92010.8	92960.6	93974.1	94593.5	95468.9	96052.7	96559	97043.6	97426	97707	98039.7	98238.2	98456.2
356	6974.94	75222.6	79555.5	82568.5	85015.4	87550.8	89093.9	90814.7	92125.5	93079.8	94083.7	94700.5	95553.9	96118	96619.5	97093.3	97479.2	97752.3	98097.2	98285	98502.6
357	6990.6	75361	79724.1	82740.6	85178.9	87702.7	89240.4	90952.2	92250.6	93185.6	94196.4	94790.2	95640.2	96205.9	96690.7	97159	97537.5	97812.9	98143.9	98321.5	98540.2
358	7004.42	75528.4	79889	82913.5	85334.5	87850.2	89392.1	91077.5	92377.3	93291.2	94295.7	94887.7	95731	96281.5	96758.3	97215.9	97603.5	97853	98191.4	98347.8	98562.1
359	7019.73	75667.5	80048.2	83073.4	85503.6	88023.1	89520.4	91199.8	92507	93401.3	94398	94973.3	95802.1	96359.7	96813.7	97267.6	97660.2	97898.6	98229.8	98389.4	98594.6
360	7033.02	75822.5	80207.4	83231.4	85649.8	88171	89644.1	91325.2	92615.5	93502.3	94491.8	95063.3	95871	96424.8	96891.9	97324.1	97703.4	97947.7	98279.8	98420.5	98618.4
361	7047.21	75987.7	80375	83395.1	85806.4	88309.9	89782.8	91445.5	92731.7	93604	94602.8	95152.8	95941.1	96500.7	96958.5	97390.4	97750.7	97977.6	98310.6	98449.8	98658.4
362	7061.27	76139.8	80531.9	83548.8	85961.6	88457.5	89912.6	91566.7	92851	93719.4	94684.9	95243.4	96021.5	96577.4	97010.6	97437.2	97794.9	98021.3	98351.7	98480.7	98695.2
363	7075.35	76294.6	80699.1	83717.2	86109.7	88602.2	90042.6	91694.7	92958.8	93815	94776	95341.6	96090.2	96636.4	97064.7	97482.9	97839.6	98064.5	98392.4	98526.9	98732.4
364	7090.03	76457.9	80848.4	83890.4	86258	88732	90170.2	91821.9	93079.8	93916.5	94861.5	95440.1	96160.3	96716.5	97120.9	97528.3	97883.2	98103.3	98427.5	98548.8	98765.9
365	7103.3	76605.3	81001.4	84064.3	86408.8	88876	90308.8	91955.4	93193.2	94005.2	94957.9	95528.5	96221.7	96787.4	97189.1	97590.7	97934.5	98136.8	98477.2	98590.3	98783.2
366	7117.64	76748.7	81166.2	84222	86554.2	89018.4	90449.3	92076.9	93287.1	94094.7	95044.4	95602.3	96286.1	96860	97239.2	97633.2	97980.6	98179.5	98500.2	98622.5	98799.2
367	7130.74	76907.1	81322.8	84371.4	86698.5	89163.2	90582.3	92189.6	93377.6	94184.9	95130.4	95683.9	96350.7	96919.6	97291.3	97676.9	98017.2	98223.8	98545.5	98643.1	98803.8
368	7144.28	77045.7	81471.1	84523	86837.4	89304.8	90725.4	92284.2	93482.2	94270	95211.6	95752.4	96417.6	96984.4	97358.9	97732.1	98075.1	98256.5	98570.6	98668	98830.9
369	7157.39	77197.5	81621.1	84681.7	86978.4	89424.7	90840.4	92385.5	93592.5	94352.2	95294.5	95835.4	96486.6	97043.2	97416.4	97778.4	98109.8	98288	98602.3	98699.4	98849.2
370	7168.54	77346.2	81779.6	84811.7	87125.6	89551.2	90967.2	92497.4	93686.3	94426.6	95371.6	95916.4	96555.4	97115.9	97461.7	97821	98150.3	98318.5	98631.9	98723.7	98862.9
371	7182.39	77489.6	81932.5	84979.4	87252.1	89675.5	91082.2	92598.6	93783.3	94522.9	95453.8	95992.4	96611.8	97170.2	97508.8	97866.6	98173.1	98337.6	98650.5	98748.1	98883
372	7195.94	77649.5	82079.5	85125.2	87398.3	89812	91204.1	92703	93886.6	94618.7	95548.3	96078.3	96683.5	97233.5	97553.2	97916.6	98206	98366.1	98680	98774.8	98898.9
373	7208.2	77806.6	82217.8	85279.1	87537.4	89934.6	91339.2	92813.2	93993.2	94716.5	95624.2	96152.3	96734.9	97287.8	97591.2	97959.2	98246.8	98390.3	98704.7	98804.6	98914.3
374	7222.57	77960.8	82354	85424.3	87670.6	90053.2	91459.8	92912.3	94092.1	94810.6	95687.9	96215.2	96809.7	97344.3	97628.9	97997.1	98283.6	98411.3	98732.3	98822.3	98932.1
375	7235.2	78099.3	82498.2	85558.4	87813.9	90183.5	91566.2	93017.5	94188	94902.1	95761.1	96294.4	96864.2	97380.1	97674.6	98032.7	98315.7	98427.6	98747.8	98842.4	98954.8
376	7248.84	78245.7	82660.5	85710.5	87929.2	90319.6	91691.5	93114	94291.3	94972.7	95828.9	96371.8	96924.1	97424	97706.4	98063.3	98339.6	98448.5	98774.1	98852.9	98967.2
377	7261.42	78397.1	82806.6	85877.1	88051.9	90455	91808.2	93223.1	94381.4	95046.1	95891.8	96438.7	96979.3	97464.8	97748.5	98106.2	98389.4	98471.4	98797.1	98859.4	98966.8
378	7274.03	78561.4	82955.2	86022.1	88191.2	90588.9	91918.7	93330.7	94468.3	95124.9	95967.8	96506.2	97036	97514.8	97793.1	98143.6	98423.2	98485.1	98811.8	98880.8	98979
379	7286.71	78706.8	83114.8	86159.5	88330.9	90703.1	92026.8	93443.3	94551.4	95206.4	96031.2	96566.5	97096.6	97569.5	97823.3	98186.8	98455.9	98511.6	98829.3	98882.2	99001.6
380	7300.66	78859.6	83270.1	86289.1	88464.4	90820.9	92133.6	93544.8	94647.8	95274.1	96087.8	96634.6	97140.7	97617.7	97861.5	98216.4	98490.6	98526.6	98861.2	98892.6	99023.6
381	7314.47	79015.3	83404.5	86435.1	88590.8	90932.2	92236.9	93640.7	94732.8	95349.6	96154.6	96686.1	97190.9	97659.7	97900.3	98241.5	98504.4	98558.6	98874.2	98905	99031.4
382	7326.76	79138.3	83553.5	86570.1	88713.4	91054.5	92343.2	93740	94817.5	95437.8	96224.7	96731	97244.7	97710.9	97936.6	98251.1	98536	98591.9	98903.6	98907.6	99036.2
383	7340.73	79304.9	83695.3	86728.2	88835.8	91187.3	92458.2	93829.7	94893.9	95511.9	96284.3	96779.5	97298.6	97747.2	97967.4	98291.4	98549	98632.2	98925.3	98923	99061.9
384	7353.09	79472.1	83848.6	86881	88960.7	91283.8	92558.7	93928.5	94978.9	95564.6	96343.4	96829	97344.1	97789.6	98003.5	98326.3	98573	98653.4	98939.8	98934.3	99078.9
385	7366.19	79614.6	83982.5	87022.3	89073.3	91392.6	92654.9	94015.3	95058.4	95635	96419.6	96883.5	97401.1	97827.2	98038.6	98354.9	98589.1	98677.3	98962.3	98925.4	99087.5
386	7378.4	79770.3	84110.5	87157.4	89202.6	91498	92753.6	94103.6	95136.6	95700	96486.3	96936.1	97440.4	97876.9	98059.6	98388.4	98621.4	98685.2	98982.3	98933.9	99115.6
387	7391.4	79918.8	84251.7	87294.1	89323.5	91616.5	92855.1	94200.7	95215.1	95772.7	96543.1	96992.2	97492.1	97926.2	98082.4	98419.1	98641.8	98698.8	99000.1	98953.3	99123.1
388	7404.31	80065.5	84396.1	87409.7	89456.4	91728.8	92961.7	94282.9	95278.2	95845.5	96596.3	97042.8	97545.8	97956.1	98125.4	98447.2	98645.7	98714.2	99009.9	98963	99142.2
389	7417.48	80209.4	84531.8	87534.3	89589.2	91850.7	93054.7	94365.4	95345.1	95914.5	96666.9	97087.9	97595.5	97985.6	98161.9	98465.4	98676.2	98733.6	99028.9	98972	99149.8
390	7432.16	80352.2	84659.6	87665.3	89709.4	91964	93150.8	94453.8	95417.2	95972.4	96723.2	97133.2	97645.6	98022.1	98200.1	98491.5	98690	98756.1	99037	98984.5	99149.6
391	7445.33	80498.6	84802.3	87797.9	89829.7	92053.6	93240.3	94539.3	95496.7	96041.5	96782.6	97181.7	97682.7	98058.1	98230.1	98510.5	98704.6	98773.2	99038.9	98986.7	99155.3
392	7458.74	80640	84930.1	87922	89942.7	92160	93332.1	94619	95559.8	96115.7	96838.9	97224.4	97730.8	98095.8	98259.4	98523.2	98726.1	98792.6	99058.4	98998.4	99156.3
393	7472.1	80785.6	85060.9	88041.3	90057.9	92266.4	93431.4	94712.9	95641.4	96181.6	96882	97272.8	97758.2	98131.9	98282.5	98547.3	98742.1	98807.6	99062.7	99015.7	99164.2
394	7484.46	80923.7	85198.4	88173.2	90183.2	92369.5	93527.4	94789.7	95716.7	96238	96933.2	97305.1	97797	98163.5	98303.2	98563.3	98745.1	98823.9	99064.5	99026.1	99174.3
395	7498.61	81058.5	85326.6	88293.9	90301.6	92467.8	93627.9	94874.8	95804.1	96307.5	96982.5	97350.4	97840.7	98202.4	98308.8	98580.9	98757.6	98846.9	99071.4	99021.4	99168.1
396	7510.01	81196.3	85477.9	88413.5	90416	92573.7	93719.9	94970.8	95878.3	96369.9	97030.2	97401.1	97877.9	98231.6	98336.8	98596.6	98762.6	98880.1	99107.5	99027.6	99174.7
397	7522.99	81346.3	85612.4	88526.4	90521.7	92673.8	93806.8	95057.9	95938.2	96424.8	97087.6	97442.8	97908.8	98259.9	98365.8	98618.3	98772.9	98912.2	99100.9	99035.9	99174.9
398	7536.43	81486.1	85737.4	88659.6	90649.9	92771.2	93893.4	95123.5	96002.8	96482.1	97148	97478	97939	98291.7	98381.2	98645	98768.8	98916.7	99102.4	99047.5	99181.5
399	7549.31	81617.8	85855.2	88778	90762.4	92877.6	93977.8	95208.7	96066.2	96545	97187.5	97512.5	97977.6	98309.8	98410.2	98664	98778.9	98932.6	99125.1	99046.7	99204.5
400	7563.47	81764.6	85966.7	88875.6	90869.4	92965.7	94065	95280.3	96153.7	96591.5	97236.5	97545.7	98001.3	98330.4	98434.7	98682.2	98789.7	98942.7	99133.8	99074.4	99210.9
401	7576.22	81910.4	86097.6	88998.7	90980	93060.5	94146.9	95351.2	96213.3	96655.8	97294.2	97582.8	98032	98364.6	98454.2	98694.6	98806.2	98957.6	99152.8	99080.2	99215.2
402	7588.52	82046.9	86228.5	89129.5	91073.2	93157.7	94235	95419.4	96272.1	96701.2	97340.4	97626.1	98065.4	98393	98487.9	98707.1	98816.3	98968.4	99167.5	99085.9	99214.6
403	7602.34	82194.4	86364.3	89240.4	91188.8	93258	94314	95491.3	96327.7	96762.5	97375.8	97671.9	98093.8	98415.7	98516.4	98733.1	98831.7	98988.7	99169.1	99097.5	99217.7
404	7613.21	82333.1	86489	89355.8	91308.2	93353.4	94410.9	95558.6	96377.1	96811.5	97417.8	97716.6	98114.7	98440.5	98548.3	98749.4	98859.4	99004.1	99172.8	99101.9	99210.2
405	7625.78	82475.4	86626.3	89461.5	91407.6	93449.6	94503.2	95641.2	96431.3	96857.4	97467.8	97765.6	98147.1	98464.9	98567.3	98767.2	98870.7	99024.2	99175.8	99112.6	99218
406	7638.57	82607.7	86746.6	89601.4	91507.9	93535	94591.5	95694.4	96480.5	96904.2	97510.1	97803.9	98181	98494	98592.4	98779.2	98888	99048.8	99181.8	99123.4	99230.7
407	7651.57	82732.9	86875.9	89733.9	91619.6	93619.6	94665.4	95771.2	96535	96956.6	97554.8	97842.9	98207.1	98509.8	98615.6	98798.3	98914.8	99059.1	99193.2	99146.7	99237.8
408	7663.6	82871	86995.6	89840.2	91742.8	93705.8	94745.5	95836.4	96594.5	97004	97595.2	97870.1	98235.2	98540.8	98627.9	98814.8	98931.5	99071.9	99209	99145.7	99226.1
409	7677.41	83006.4	87117.2	89953	91833	93787.9	94828.7	95901.1	96672.7	97040.2	97619.6	97913	98258.9	98550.7	98656.2	98842.7	98947.8	99085.2	99230.6	99152.2	99225.1
410	7689.54	83144.5	87238	90074.3	91929.4	93876.7	94894.8	95968	96729.8	97094.4	97671.7	97949.5	98288.8	98569.1	98667.5	98855.4	98969.8	99089.7	99227.5	99154.4	99237.2
411	7702.97	83279.7	87364.4	90188.5	92039.7	93957.1	94969.6	96040.3	96775.8	97141.5	97710.8	97983.2	98316.1	98595.7	98700.9	98874.2	98982.7	99105.8	99214.2	99161.7	99250.7
412	7714.81	83417.3	87476.4	90307.2	92147.8	94048.7	95044.3	96109.8	96822.8	97181.2	97749.4	98022.6	98333.1	98617.1	98710.6	98892.3	98989.4	99122.7	99220.6	99173.8	99259.2
413	7726.36	83557.4	87595	90405.1	92233.5	94140.6	95116.3	96181.7	96863.5	97232.3	97781.6	98058.9	98360.1	98648.8	98743.6	98912.2	98999.2	99151.5	99234.4	99176.7	99261.7
414	7739.39	83688.4	87714.6	90519.2	92335.1	94241.2	95193	96239.2	96910.5	97282.9	97815.4	98097.9	98400.2	98675.5	98756.5	98941.4	99016.7	99172.1	99241.7	99180	99270.8
415	7752.58	83827.1	87838.1	90639.6	92442.3	94319.8	95265.1	96289.7	96952.2	97323.9	97842.1	98129.4	98432.4	98701.7	98772.4	98964.9	99030.2	99183	99242.1	99192.3	99273.2
416	7766.04	83957.5	87963.4	90765.7	92542	94412.2	95328.1	96353.3	97001.9	97363.3	97900.8	98166.7	98465.7	98727.2	98801.6	98982.6	99036.9	99202	99257	99203.8	99290.3
417	7777.68	84084	88094.9	90863.1	92630.1	94505.7	95408.9	96417.5	97051.9	97396.9	97942.8	98194.1	98492.4	98744.9	98837	98994.4	99048.4	99203.6	99267.3	99209.2	99297.1
418	7790.11	84219.3	88222.2	90966.7	92741.2	94582	95465.2	96478.2	97102.5	97439.4	97975	98230.3	98526.5	98767.3	98845.1	99008.4	99067.5	99214.7	99287.7	99220.6	99311.4
419	7802.8	84351	88330.1	91066.8	92846.2	94659.1	95538.8	96543.3	97144.8	97484	98012.7	98247.2	98560.6	98793.6	98862.5	99019.7	99080.5	99230.4	99292.2	99231.9	99331.2
420	7815.28	84481.5	88442.9	91175.3	92944.7	94742	95607.8	96594.6	97186.1	97537.7	98043.7	98275.6	98588.8	98815.5	98887.8	99024.6	99094.3	99238.2	99289.7	99253.9	99339
421	7826.9	84619.2	88573.7	91264.4	93037.7	94818.2	95683.3	96643.1	97228.9	97557.9	98079.3	98292.3	98606.4	98836.2	98917.2	99043.9	99108.7	99236.8	99297.3	99265.4	99339.8
422	7840.07	84753.1	88697.8	91367.6	93149	94881	95744.7	96701.4	97286	97587	98094.8	98326.5	98638.5	98850	98939.1	99062.1	99141.1	99256.3	99301	99284.9	99344.1
423	7852.07	84885.7	88811.6	91469.2	93248.1	94960.1	95824.8	96745.2	97326	97634.1	98117.5	98364.5	98675.8	98875.9	98958.7	99078.2	99164.4	99275.2	99302.9	99291.7	99357
424	7863.62	85018	88950	91567.9	93338.3	95029.7	95879.2	96797.1	97373.8	97675.6	98145	98388.3	98698.3	98882.2	98974.3	99077.6	99178.2	99283.8	99311.1	99309.3	99368.9
425	7875.84	85141	89055.5	91664.6	93440.5	95095.4	95935.5	96851.3	97419.2	97710.7	98178.6	98397.8	98723.4	98902.6	98992	99092	99183.6	99278.4	99327.9	99318.3	99382.6
426	7887.29	85281.3	89173.5	91762.5	93526.8	95162.6	95998.1	96895.6	97461.9	97754.5	98199.7	98423	98739.5	98925.5	99012.8	99104.3	99182.2	99294	99337.6	99332.4	99390.3
427	7900.69	85411.2	89285.8	91854.6	93613	95230.7	96065.3	96940.6	97491.7	97787.4	98224.7	98454.2	98768.8	98943	99026.4	99113.6	99186.9	99312.7	99349.1	99344.6	99405.2
428	7913.74	85535	89394.1	91968.9	93719.7	95315.2	96124.1	96981.6	97531.1	97829.8	98249.9	98488.3	98782.3	98945.5	99039.2	99130.6	99197.5	99312.6	99354	99359.1	99415.3
429	7925.89	85658.9	89509.5	92075.4	93820.7	95396.9	96177.5	97040.4	97568.2	97862.2	98269.9	98506.7	98808.8	98953.1	99061.4	99139.6	99221.6	99327.2	99374.3	99374.4	99417.2
430	7940.37	85773.2	89640.5	92179.2	93903.5	95465.4	96239.9	97087.7	97609.9	97899.5	98296	98532.8	98821.9	98954.5	99079.5	99170.9	99242.1	99334.3	99373.7	99366.6	99441.2
431	7951.37	85897.5	89754.6	92276.3	93994.3	95530	96296.9	97143.1	97640.6	97945.2	98326.7	98573.8	98849.3	98969.5	99092.1	99170.4	99264.7	99355.2	99387.9	99392.9	99440.5
432	7963.89	86030	89858.9	92389.3	94075	95615.8	96356.9	97187.6	97687.3	97974.5	98356.9	98608.3	98878.7	98985.4	99102.8	99184.7	99272.6	99369.3	99392.2	99415.8	99452.4
433	7975.31	86152.3	89966.8	92483	94152.9	95677.5	96411.4	97233	97721.4	98004.7	98377.5	98620.7	98922.9	99011.8	99113	99200.3	99288.1	99380.6	99389.7	99425.1	99454.6
434	7986.44	86270.1	90086	92586.5	94237.1	95731.9	96446.4	97281	97755.8	98045.7	98398.2	98636.6	98947.4	99010.1	99116.5	99219.2	99293.4	99402.5	99401.7	99443.6	99467.6
435	7999.95	86403.1	90197.5	92684.1	94309.4	95801.8	96513.6	97324.9	97792.3	98097.4	98433.1	98665.1	98966.2	99013.3	99136.6	99232.3	99320.8	99418	99417.1	99445.9	99482.1
436	8010.82	86526.4	90305.3	92774.9	94402.8	95880	96564.3	97369.3	97840.5	98136.6	98461.4	98690	98987.1	99038.3	99163.2	99245.5	99331.4	99434.8	99424.3	99456.2	99494.3
437	8023.85	86658.8	90414.8	92856.8	94487.1	95945	96608.3	97405	97879.6	98165.4	98479.1	98703.9	99001.2	99039.6	99168.4	99256.9	99359.1	99456.4	99446.7	99485.8	99507.3
438	8035.39	86774.8	90518.6	92945.5	94573.9	96004.3	96660.5	97446.1	97915.5	98200.6	98498.1	98737.7	99022.2	99055.8	99190.4	99278.5	99375.5	99475.9	99458.7	99506.6	99521.2
439	8047.57	86910.7	90632	93034.2	94647.4	96056.6	96719.3	97493.9	97961.7	98239.9	98521.1	98767.7	99043.9	99076.7	99199.8	99295.3	99399.1	99482.8	99471.6	99508.5	99542.5
440	8059.17	87031.5	90746.2	93115.5	94721.5	96118	96768.5	97534.1	97996.1	98271.4	98535.8	98786.8	99059.5	99097.7	99221.5	99311.2	99421.7	99492.3	99481.8	99514.7	99551.8
441	8070.86	87146.9	90838.8	93208	94795.1	96177.5	96827.2	97572.9	98034	98323.6	98557.2	98807.7	99079.2	99113.9	99230.6	99321.5	99443.6	99504.7	99495.7	99537.4	99561.9
442	8083.27	87272.3	90940.6	93291.7	94882.9	96217.4	96885	97597.3	98067.1	98349.9	98586.5	98838.2	99091.7	99126	99229.7	99330.4	99453.4	99517.1	99500.1	99551	99580.8
443	8093.84	87390.7	91047.8	93391.1	94955.2	96287.5	96932.8	97633.8	98106.7	98385.7	98606.8	98852.4	99123.1	99151.3	99244.7	99344.4	99479.7	99520.1	99519.2	99558.2	99584.5
444	8107.38	87496.1	91157.2	93475.7	95037.4	96345.5	96980.2	97663.5	98128.6	98422.4	98631.1	98868.7	99137.6	99160	99268.8	99345.4	99483.1	99541.2	99520.7	99563.7	99584.1
445	8118.78	87618.3	91267.9	93565	95119.7	96406.9	97044.4	97699.5	98165.7	98453.1	98648.9	98897.2	99147.6	99197.6	99280.6	99355.4	99495.4	99544.7	99537.8	99581.4	99597.3
446	8131.01	87725.4	91378.8	93650.8	95179.5	96470.8	97101.6	97733	98191.9	98487.2	98663.2	98923.4	99149.9	99216.5	99289.4	99366.9	99504	99552.8	99542.5	99595.3	99615
447	8143.04	87843.1	91480.3	93744.8	95247.7	96517.5	97154.1	97768.6	98223.6	98511.3	98674.9	98940.4	99160.7	99218.2	99309.2	99386.9	99507.6	99567.7	99555.2	99624.3	99639.1
448	8154.2	87962.9	91572.6	93818.3	95317.2	96572.2	97206.6	97800.9	98256.6	98549.3	98706.6	98968.2	99179.9	99246	99318.6	99400.4	99520.7	99583	99573	99634.7	99656.3
449	8164.88	88062.9	91669	93916.6	95393.3	96630.5	97272.6	97838.5	98283.3	98578.9	98721	98985.8	99181.4	99260.7	99336.5	99409.2	99520.6	99587.8	99585.3	99644.1	99673.3
450	8175.36	88161.3	91772.8	94001.8	95465.4	96675.4	97312.3	97870.5	98324	98604.9	98745	98991.6	99191.6	99278.6	99352.2	99426.1	99530.7	99602.4	99590.6	99661	99692
451	8188.57	88267	91881.1	94090.6	95527.3	96717.6	97375.9	97902.6	98354.4	98624.7	98771.1	99020.3	99207.3	99291.5	99365.4	99450.7	99544.4	99609.8	99604.3	99674.7	99718.4
452	8200.77	88370.1	91988.7	94175.6	95586.6	96764.8	97433	97946.5	98394.7	98661.6	98795.5	99044.2	99232.6	99310.7	99382.3	99463.2	99544.3	99608.2	99608.9	99682.1	99741.1
453	8210.91	88485	92087.2	94249.7	95660.4	96818.1	97478.9	97981.6	98414.5	98698.2	98823.6	99049.4	99258	99330.2	99395	99472.3	99547.9	99624.3	99637.2	99695.9	99745.3
454	8222.22	88599.2	92197.9	94320.7	95714.3	96872.4	97523.8	98026	98451.2	98720.3	98860.7	99061.8	99278.1	99344.2	99397	99493.3	99560.7	99637.7	99645.8	99707.2	99745.8
455	8233.74	88703.7	92296.8	94405.6	95774.6	96923.2	97567.9	98070.9	98464.3	98750.7	98886.9	99085.7	99281.2	99352.3	99398.8	99501.9	99562.6	99644.1	99668.3	99734.9	99767.2
456	8247	88827	92394.4	94487.3	95833.8	96969.5	97606.2	98106.8	98496.4	98797	98910.9	99115.1	99292.9	99368.6	99409.6	99518.4	99574.6	99656	99682.4	99745.2	99779.3
457	8260.67	88931	92493.5	94573.1	95891.9	97017.8	97664.1	98142	98530.2	98826.4	98922.1	99128.5	99297.8	99367.5	99418.6	99530.3	99594.3	99664.6	99698.7	99755.5	99796.7
458	8272.12	89044.8	92588.8	94646.1	95956.4	97056.8	97722.4	98187.5	98554.8	98840.8	98934.5	99147.4	99314.1	99380.5	99438.3	99541.5	99610.1	99683.2	99719.6	99775.9	99806.2
459	8284.55	89168.8	92681	94720.3	96007.9	97097.3	97770.9	98217.8	98576.8	98859.3	98970	99170.5	99317.3	99384.7	99452.5	99558.7	99610.2	99690	99737.8	99791.6	99816
460	8295.52	89266.3	92774.3	94789.7	96059.7	97141.7	97808.1	98247.1	98602.5	98876.7	98992.1	99185.1	99330.1	99402.1	99473.1	99571.5	99627.5	99682.4	99745.6	99803.8	99831.2
461	8305.27	89374.8	92857.7	94878.8	96119.4	97168	97854.3	98280	98617.5	98893.9	99003.6	99199	99348.3	99415.2	99480.1	99581.1	99642	99698.4	99756.3	99815.8	99843.8
462	8315.59	89469.2	92946.2	94950	96188.8	97226.9	97896.7	98305.1	98644.4	98926	99021.3	99208.8	99337.1	99432.9	99481.1	99600.3	99658.1	99715.9	99765.4	99810.9	99849.8
463	8327.55	89559.3	93037.2	95031	96254.2	97263.7	97924.1	98333.1	98667.7	98951.8	99048.4	99231.6	99350.4	99452.1	99499.6	99611.7	99666	99725.8	99779.8	99825.2	99858.5
464	8339.57	89661.3	93115.9	95109.1	96307.6	97306.8	97963.2	98361.3	98698.8	98980.1	99061.7	99263.8	99373.9	99467	99515.2	99631.8	99681.2	99740.3	99791.3	99832.5	99859.2
465	8349.91	89761.4	93195.5	95175.9	96348.8	97347.5	98009.3	98369.7	98705.4	98998.3	99074.8	99269.7	99378.1	99479.5	99532.9	99634.9	99699.3	99753.4	99790	99835.1	99869.6
466	8361.95	89870.6	93277.7	95260.5	96418.4	97374.7	98044.5	98402.6	98742.8	99025.4	99088.1	99278.2	99393.3	99482.8	99545.6	99648.2	99720.5	99778.6	99796	99846.1	99871
467	8372.39	89971.2	93358.2	95326.3	96463.7	97416.1	98079.4	98426.7	98764.8	99051.9	99107	99291.6	99409.3	99487.8	99549	99644.8	99730	99793.6	99819.3	99859.9	99875.1
468	8383.26	90064.2	93439.1	95393.9	96511.9	97454.1	98119.2	98467.7	98783.2	99061.3	99123	99331.4	99435.7	99493.9	99566.9	99662.5	99751.6	99803.5	99841.2	99872.7	99886.4
469	8393.92	90165.8	93512	95465.9	96570.1	97496.7	98157.3	98489.8	98807.4	99073.2	99150.5	99359	99436.4	99505.8	99570.9	99673.2	99760.1	99803.4	99853.5	99873.8	99892.8
470	8405.74	90264.9	93596.2	95537.6	96629.4	97544.7	98176.7	98532	98833.1	99089.9	99172.1	99366.2	99462.7	99515.5	99597.4	99685.4	99772	99813	99872.3	99872.6	99889.9
471	8417.08	90364.7	93685.7	95600.6	96682.2	97582.6	98208.3	98569.7	98853.7	99095.8	99195	99383.2	99474.6	99525.6	99616.1	99703.8	99773.8	99831.6	99884.8	99875.8	99886.6
472	8427.48	90479	93761.7	95675.7	96733.5	97633.2	98228.5	98592.9	98879.5	99112.8	99219.1	99387.9	99489.4	99532.6	99618.3	99716.7	99786.8	99840.9	99892.7	99883.3	99901.7
473	8437.36	90570.1	93848.7	95735.2	96790.1	97648.9	98265.1	98616.3	98904.2	99137.5	99233.9	99411.5	99498.8	99545.4	99625.8	99732.3	99793.9	99858.1	99922.7	99876.3	99914.8
474	8447.34	90671.8	93941.5	95801.8	96838.9	97685.5	98294.2	98632.5	98924.4	99153.8	99265.7	99428.4	99507.8	99554	99635.6	99734	99807.4	99858.1	99928	99881.4	99929.7
475	8458.46	90775.8	94012.5	95867.7	96887.8	97729.6	98329.1	98650.2	98951	99162.5	99296.1	99438	99517.5	99575	99647.7	99750.1	99808.3	99880.4	99945.9	99888.6	99946.3
476	8470.52	90873.4	94104.7	95940.1	96937.8	97762.4	98361.3	98676.6	98974.6	99196.8	99315.5	99467.8	99524.5	99577.8	99659.9	99768.1	99806.6	99888.6	99967.6	99899.4	99961.6
477	8483.02	90958.9	94189.8	96005.7	96986.1	97802.6	98394.3	98710	99010.5	99221.8	99338.6	99475	99536.1	99585.7	99674	99763.7	99818.4	99896.3	99982.6	99908.4	99968.5
478	8494.75	91059.3	94268.6	96054.4	97041.6	97829.6	98422.1	98734	99040.1	99244.9	99346.5	99496.1	99550.1	99608	99690	99777.9	99811.4	99915.8	100003	99921.9	99978.3
479	8505.53	91135.4	94319.9	96098.5	97081.3	97860.6	98449.1	98758.1	99052.1	99268.5	99368.5	99510.8	99558.4	99607.4	99697.6	99787.2	99834.6	99921.4	100014	99909.1	99988.2
480	8516.3	91223.2	94398.7	96158.8	97133	97909.4	98471.1	98783.1	99078.4	99274.4	99395.4	99529.2	99563.3	99637.6	99700.4	99800.1	99847	99939.4	100026	99914.6	99989.7
481	8526.04	91324.6	94464.5	96230	97199.6	97937.4	98495.3	98807.6	99090	99291.9	99419	99529.1	99575.6	99653.1	99718.3	99815.3	99853.6	99951.8	100022	99922.4	100006
482	8536	91410.2	94554.4	96291.8	97245.6	97983.2	98528.5	98828.3	99111	99313.7	99433.7	99550.9	99587.3	99663.2	99722.9	99823.5	99874.8	99960.7	100016	99933.8	100020
483	8545.1	91490.6	94635	96349.7	97297.9	98009.8	98551	98855	99132	99321.7	99458.7	99561.5	99597.8	99681.6	99748.5	99824.8	99882.6	99960.3	100010	99956.5	100036
484	8554.18	91593.3	94710.9	96400.9	97332.7	98048.5	98589.6	98882.4	99155.4	99338.6	99480.7	99570.2	99606.9	99701.5	99752	99829.9	99877.1	99962.6	100013	99956.9	100034
485	8563.37	91671.7	94766.8	96452.5	97380.6	98077.1	98623.3	98905.3	99175.8	99355.2	99511.4	99591	99618.8	99697.7	99765.7	99835.3	99885.7	99967.4	100020	99958.3	100042
486	8573.21	91769.4	94843.4	96503.3	97438.6	98118.6	98652	98932.6	99184.3	99370.1	99532.2	99597.1	99627.4	99705.8	99780.7	99851.3	99888.5	99980.5	100023	99965.2	100051
487	8583.66	91858.7	94909.5	96561.7	97483.9	98144.5	98693.3	98960.8	99196.1	99387.6	99544.1	99613.1	99626.1	99722.9	99784.7	99852.9	99906.8	99993.1	100021	99965.1	100052
488	8593.88	91951.8	94968	96612.9	97534.9	98183.7	98735.4	98987.6	99224.6	99394.1	99553.9	99622.6	99635	99744.8	99803.9	99861	99911.4	99995.2	100040	99970.4	100069
489	8603.05	92051.6	95035.9	96651.1	97576.5	98229.2	98756.6	98999	99246	99399.6	99559.6	99623.5	99634.3	99764.8	99813.9	99875.8	99930.1	100002	100049	99969.6	100063
490	8613.21	92131.8	95105.9	96700.6	97625.4	98262.6	98784.7	99018.2	99256.1	99405.9	99572.7	99629.4	99652.3	99763.6	99818.3	99885	99939.2	100005	100043	99979.6	100061
491	8623.69	92200	95170.4	96740.7	97671.7	98306.2	98808.6	99025.2	99270.6	99429.2	99597.4	99653.2	99655.1	99772.4	99830.9	99888	99955.9	99996.9	100052	99966.8	100075
492	8633.33	92293	95242.3	96789.2	97716.1	98338.1	98829.2	99057.3	99295.7	99430.4	99599.6	99663.7	99667.9	99766.7	99834.4	99886.7	99958.4	100005	100062	99975.5	100082
493	8643.97	92378	95301.4	96841.9	97748.8	98374.7	98860	99092.1	99317.1	99445	99607.3	99682.8	99668.1	99783.5	99850.2	99895.4	99953.2	100021	100059	99980.5	100091
494	8654.31	92454.7	95354.8	96888.4	97788.2	98409.5	98884	99113.3	99325	99457.8	99619	99699.6	99670.5	99797.8	99864	99892.4	99960.8	100028	100064	99972.9	100100
495	8664.91	92542.9	95407.9	96936.2	97835	98430.1	98916.8	99130.7	99347.1	99464.1	99636.2	99702.4	99670.4	99805.5	99852.6	99901.2	99959.6	100026	100071	99974.2	100085
496	8675.1	92622.8	95460.6	96989.3	97879.9	98454.4	98934.3	99145.9	99354.5	99476.4	99641.2	99715.4	99683.5	99815.4	99854.8	99921	99959.9	100025	100069	99977.7	100095
497	8686.16	92697	95519.5	97025.7	97924.6	98482.9	98959	99150.3	99367.4	99487.4	99658.4	99706.5	99694	99838.6	99880.4	99929.8	99982.9	100016	100068	99994.4	100095
498	8696.48	92779	95571.3	97070.7	97947.8	98517	98975.2	99165.4	99386.6	99503	99669.9	99711.3	99693.9	99848.5	99901.1	99940	99988.8	100023	100066	100004	100094
499	8707.63	92861	95631.4	97119.6	97979.3	98531.8	98989.7	99176.9	99401.4	99513.9	99685.3	99720.4	99690.9	99852.9	99909.4	99949.4	99994.3	100030	100080	100003	100099
500	8716.52	92942.8	95703.3	97172.1	98006.1	98538.4	99012.3	99195.7	99413.4	99533.8	99695.8	99723.6	99686.8	99851.2	99908.2	99951.8	99999.7	100036	100095	100006	100106
